# Supplementary material for: A novel method for irrigating plants, tracking water use, and imposing water deficits in controlled environments
Source: Front Plant Sci. 2023 Aug 29;14:1201102. doi: 10.3389/fpls.2023.1201102 (PMC10497755; doi:10.3389/fpls.2023.1201102)
Supplement: Supplementary file 1 [file DataSheet_1.xlsx]

## Sheet: Calibration Data
Soil	VSWC	Target weight (g)	Measured weight (g)	Reading 1	Reading 2	Reading 3	Reading 4	4-Reading Mean (us)	4-Reading Mean (ms)
40% CC	0	3041.6	3041.6	2040	2040	2040	2040	2040	2.04
40% CC	5	3153.85	3154.3	2060	2060	2050	2050	2055	2.055
40% CC	10	3266.1	3266.8	2080	2080	2080	2080	2080	2.08
40% CC	15	3378.35	3379.4	2120	2120	2120	2120	2120	2.12
40% CC	20	3490.6	3491	2170	2170	2170	2170	2170	2.17
40% CC	25	3602.85	3603.7	2260	2260	2260	2270	2262.5	2.2625
40% CC	30	3715.1	3716.2	2340	2340	2340	2340	2340	2.34
40% CC	35	3827.35	3827	2490	2480	2480	2480	2482.5	2.4825
40% CC	40	3939.6	3938	2700	2700	2711	2710	2705.25	2.70525
40% CC	45	4051.85	4051	3080	3080	3080	3080	3080	3.08
Fitted function (for graphing purposes only)
x	f(x)
2.04	1.62156
2.05	3.18469
2.06	4.69149
2.07	6.144
2.08	7.54417
2.09	8.89388
2.1	10.195
2.11	11.4491
2.12	12.6581
2.13	13.8236
2.14	14.947
2.15	16.03
2.16	17.0739
2.17	18.0802
2.18	19.0502
2.19	19.9853
2.2	20.8867
2.21	21.7556
2.22	22.5932
2.23	23.4007
2.24	24.179
2.25	24.9293
2.26	25.6525
2.27	26.3497
2.28	27.0218
2.29	27.6696
2.3	28.2941
2.31	28.8961
2.32	29.4764
2.33	30.0358
2.34	30.575
2.35	31.0948
2.36	31.5959
2.37	32.0789
2.38	32.5445
2.39	32.9933
2.4	33.426
2.41	33.8431
2.42	34.2451
2.43	34.6326
2.44	35.0062
2.45	35.3663
2.46	35.7135
2.47	36.0481
2.48	36.3707
2.49	36.6817
2.5	36.9814
2.51	37.2704
2.52	37.5489
2.53	37.8174
2.54	38.0762
2.55	38.3257
2.56	38.5662
2.57	38.7981
2.58	39.0215
2.59	39.237
2.6	39.4446
2.61	39.6448
2.62	39.8378
2.63	40.0238
2.64	40.2031
2.65	40.376
2.66	40.5426
2.67	40.7032
2.68	40.8581
2.69	41.0073
2.7	41.1512
2.71	41.2899
2.72	41.4236
2.73	41.5525
2.74	41.6767
2.75	41.7964
2.76	41.9119
2.77	42.0232
2.78	42.1304
2.79	42.2338
2.8	42.3335
2.81	42.4296
2.82	42.5222
2.83	42.6115
2.84	42.6976
2.85	42.7805
2.86	42.8605
2.87	42.9376
2.88	43.0119
2.89	43.0836
2.9	43.1526
2.91	43.2192
2.92	43.2834
2.93	43.3452
2.94	43.4049
2.95	43.4623
2.96	43.5177
2.97	43.5712
2.98	43.6226
2.99	43.6723
3	43.7201
3.01	43.7662
3.02	43.8107
3.03	43.8536
3.04	43.8949
3.05	43.9347
3.06	43.9731
3.07	44.0101
3.08	44.0458
3.09	44.0801
3.1	44.1133
3.11	44.1452
3.12	44.176
3.13	44.2057
3.14	44.2344
3.15	44.2619
3.16	44.2885
3.17	44.3142
3.18	44.3389
3.19	44.3627
3.2	44.3857
3.21	44.4078
3.22	44.4292
3.23	44.4497
3.24	44.4696
3.25	44.4887
3.26	44.5071
3.27	44.5249
3.28	44.542
3.29	44.5585
3.3	44.5744
3.31	44.5897
3.32	44.6045
3.33	44.6188
3.34	44.6325
3.35	44.6457
3.36	44.6585
3.37	44.6708
3.38	44.6827
3.39	44.6941
3.4	44.7051
3.41	44.7158
3.42	44.726
3.43	44.7359
3.44	44.7454
3.45	44.7546
3.46	44.7634
3.47	44.7719
3.48	44.7802
3.49	44.7881
3.5	44.7957
3.51	44.8031
3.52	44.8102
3.53	44.817
3.54	44.8236
3.55	44.83
3.56	44.8361
3.57	44.842
3.58	44.8477
3.59	44.8532
3.6	44.8585
3.61	44.8636
3.62	44.8685
3.63	44.8732
3.64	44.8778
3.65	44.8822
3.66	44.8864
3.67	44.8905
3.68	44.8945
3.69	44.8983
3.7	44.9019
3.71	44.9055
3.72	44.9089
3.73	44.9122
3.74	44.9153
3.75	44.9184
3.76	44.9213
3.77	44.9242
3.78	44.9269
3.79	44.9295
3.8	44.9321

## Sheet: Pre-Planting
Pot	Port	4 DBP	3 DBP	2 DBP	DOP		4 DBP	3 DBP	2 DBP	DOP
1	1	2240	2230	2210	2200		24.179	23.4007	21.7556	20.8867			Dummy Block Averages					Dummy Block Standard Errors
1	2	2430	2420	2380	2360		34.6326	34.2451	32.5445	31.5959
1	3	2760	2760	2680	2610		41.9119	41.9119	40.8581	39.6448			4 DBP	3 DBP	2 DBP	DOP		4 DBP	3 DBP	2 DBP	DOP
1	4	3010	3030	3020	3030		43.7662	43.8536	43.8107	43.8536			25.4764	23.3424	22.0282	21.8545		0.732124	1.41224	1.73591	1.8564
2	1	2260	2200	2180	2180		25.6525	20.8867	19.0502	19.0502			32.9494	31.8132	30.8601	30.6703		1.82382	2.75231	2.29392	2.01711
2	2	2440	2390	2380	2380		35.0062	32.9933	32.5445	32.5445			39.9232	39.65	38.9787	38.5315		1.42401	2.23711	2.04592	1.89622
2	3	2600	2600	2600	2590		39.4446	39.4446	39.4446	39.237			43.2623	43.3648	43.3241	43.4394		0.306539	0.310059	0.320893	0.313512
2	4	2880	2890	2900	2930		43.0119	43.0836	43.1526	43.3452
3	1	2240	2220	2210	2210		24.179	22.5932	21.7556	21.7556
3	2	2390	2370	2350	2350		32.9933	32.0789	31.0948	31.0948			25.9455	23.6614	23.164	22.558		5.92814	5.05271	5.94082	4.9405
3	3	2700	2690	2640	2640		41.1512	41.0073	40.2031	40.2031			31.853	30.6504	29.4723	29.1125		1.13331	0.754997	0.988606	0.999487
3	4	3020	3030	3020	3040		43.8107	43.8536	43.8107	43.8949			40.0224	39.78	38.5865	38.2651		0.254971	0.288703	0.549618	0.769889
4	1	2280	2260	2240	2240		27.0218	25.6525	24.179	24.179			43.2035	43.2743	43.0244	43.09		0.0484451	0.0704237	0.0564032	0.0492637
4	2	2330	2290	2280	2280		30.0358	27.6696	27.0218	27.0218
4	3	2510	2470	2450	2440		37.2704	36.0481	35.3663	35.0062
4	4	2760	2770	2760	2770		41.9119	42.0232	41.9119	42.0232			24.9941	23.171	22.5631	22.0603		1.79878	1.62083	0.757552	0.85197
5	1	2270	2240	2230	2230		26.3497	24.179	23.4007	23.4007			30.8563	29.748	29.3351	29.3351		0.522794	1.08252	0.471326	0.471326
5	2	2370	2370	2350	2350		32.0789	32.0789	31.0948	31.0948			39.102	39.0377	38.7962	38.1697		1.13712	1.02612	0.643351	0.825625
5	3	2620	2620	2580	2560		39.8378	39.8378	39.0215	38.5662			42.9041	43.1393	43.1696	43.3049		0.0963415	0.130027	0.125949	0.145449
5	4	3020	3070	3050	3090		43.8107	44.0101	43.9347	44.0801
6	1	2290	2240	2240	2230		27.6696	24.179	24.179	23.4007
6	2	2410	2410	2390	2390		33.8431	33.8431	32.9933	32.9933			25.1058	22.864	22.1747	21.8668		2.38578	1.3136	2.11288	1.54643
6	3	2680	2680	2630	2630		40.8581	40.8581	40.0238	40.0238			31.6447	30.2426	30.4081	30.5881		0.771423	1.90446	1.00049	1.55659
6	4	3010	3000	2980	2990		43.7662	43.7201	43.6226	43.6723			38.9914	39.1241	38.2483	37.9319		1.51502	1.6771	1.87014	1.42652
7	1	2300	2260	2260	2230		28.2941	25.6525	25.6525	23.4007			43.3449	43.5216	43.5057	43.6023		0.348507	0.435684	0.377951	0.409778
7	2	2410	2390	2360	2360		33.8431	32.9933	31.5959	31.5959
7	3	2680	2650	2560	2530		40.8581	40.376	38.5662	37.8174
7	4	2940	2940	2930	2940		43.4049	43.4049	43.3452	43.4049
8	1	2320	2290	2280	2280		29.4764	27.6696	27.0218	27.0218
8	2	2430	2400	2360	2350		34.6326	33.426	31.5959	31.0948
8	3	2840	2820	2730	2710		42.6976	42.5222	41.5525	41.2899			Grand Average
8	4	3000	3010	2990	3030		43.7201	43.7662	43.6723	43.8536
9	1	2230	2210	2200	2200		23.4007	21.7556	20.8867	20.8867
9	2	2340	2340	2310	2310		30.575	30.575	28.8961	28.8961				4 DBP	3 DBP	2 DBP	DOP
9	3	2710	2700	2650	2640		41.2899	41.1512	40.376	40.2031			1	25.3804	23.2597	22.4825	22.0849
9	4	3000	3030	3010	3030		43.7201	43.8536	43.7662	43.8536			2	32.1345	31.0968	30.4596	30.4061
10	1	2200	2180	2170	2170		20.8867	19.0502	18.0802	18.0802			3	39.8605	39.7487	39.004	38.5761
10	2	2380	2370	2350	2340		32.5445	32.0789	31.0948	30.575			4	43.3241	43.4681	43.4359	43.5416
10	3	2720	2690	2600	2580		41.4236	41.0073	39.4446	39.0215
10	4	3170	3250	3170	3170		44.3142	44.4887	44.3142	44.3142
11	1	2240	2210	2210	2200		24.179	21.7556	21.7556	20.8867
11	2	2360	2340	2320	2320		31.5959	30.575	29.4764	29.4764
11	3	2680	2670	2620	2590		40.8581	40.7032	39.8378	39.237
11	4	2840	2850	2850	2880		42.6976	42.7805	42.7805	43.0119
12	1	2220	2210	2200	2200		22.5932	21.7556	20.8867	20.8867
12	2	2330	2310	2300	2300		30.0358	28.8961	28.2941	28.2941
12	3	2530	2530	2520	2510		37.8174	37.8174	37.5489	37.2704
12	4	2860	2970	2990	3030		42.8605	43.5712	43.6723	43.8536
13	1	2290	2270	2240	2240		27.6696	26.3497	24.179	24.179
13	2	2320	2300	2300	2300		29.4764	28.2941	28.2941	28.2941
13	3	2510	2510	2520	2480		37.2704	37.2704	37.5489	36.3707
13	4	2860	2880	2900	2920		42.8605	43.0119	43.1526	43.2834
14	1	2240	2230	2230	2220		24.179	23.4007	23.4007	22.5932
14	2	2370	2370	2340	2340		32.0789	32.0789	30.575	30.575
14	3	2660	2650	2630	2610		40.5426	40.376	40.0238	39.6448
14	4	2810	2820	2820	2820		42.4296	42.5222	42.5222	42.5222
15	1	2270	2220	2220	2210		26.3497	22.5932	22.5932	21.7556
15	2	2350	2310	2330	2330		31.0948	28.8961	30.0358	30.0358
15	3	2580	2580	2580	2550		39.0215	39.0215	39.0215	38.3257
15	4	2990	3020	3000	3030		43.6723	43.8107	43.7201	43.8536
16	1	2310	2260	2260	2240		28.8961	25.6525	25.6525	24.179
16	2	2360	2330	2330	2330		31.5959	30.0358	30.0358	30.0358
16	3	2500	2500	2480	2480		36.9814	36.9814	36.3707	36.3707
16	4	2950	2980	2960	3030		43.4623	43.6226	43.5177	43.8536
17	1	2240	2230	2220	2220		24.179	23.4007	22.5932	22.5932
17	2	2370	2390	2360	2360		32.0789	32.9933	31.5959	31.5959
17	3	2660	2670	2650	2600		40.5426	40.7032	40.376	39.4446
17	4	2750	2750	2760	2760		41.7964	41.7964	41.9119	41.9119
18	1	2230	2210	2200	2210		23.4007	21.7556	20.8867	21.7556
18	2	2390	2300	2370	2380		32.9933	28.2941	32.0789	32.5445
18	3	2710	2730	2660	2640		41.2899	41.5525	40.5426	40.2031
18	4	3050	3130	3090	3130		43.9347	44.2057	44.0801	44.2057
19	1	2230	2210	2210	2210		23.4007	21.7556	21.7556	21.7556
19	2	2320	2300	2300	2290		29.4764	28.2941	28.2941	27.6696
19	3	2530	2530	2490	2480		37.8174	37.8174	36.6817	36.3707
19	4	3020	3060	3060	3040		43.8107	43.9731	43.9731	43.8949
20	1	2260	2210	2190	2180		25.6525	21.7556	19.9853	19.0502
20	2	2370	2360	2330	2350		32.0789	31.5959	30.0358	31.0948
20	3	2550	2560	2510	2510		38.3257	38.5662	37.2704	37.2704
20	4	3000	3070	3080	3110		43.7201	44.0101	44.0458	44.1452

## Sheet: Growth-Cycle
Block	Pot	Treatment	Port	0 DAP	7 DAP	14 DAP	21 DAP	28 DAP	31 DAP	32 DAP	33 DAP	35 DAP	38 DAP	41 DAP	44 DAP	47 DAP	50 DAP	53 DAP	56 DAP	58 DAP	60 DAP	62 DAP	65 DAP	68 DAP	71 DAP	74 DAP	77 DAP	80 DAP	83 DAP	86 DAP	5 DPH
1	1	58	1	2370	2210	2150	2160	2160	2170	2170	2190	2170	2170	2170	2170	2190	2170	2160	2160	2160	2160	2150	2150	2150	2140	2140	2140	2140	2150	2140	2150
1	1	58	2	2450	2380	2360	2380	2360	2380	2390	2390	2390	2410	2420	2420	2480	2460	2470	2510	2530	2550	2580	2590	2590	2590	2590	2590	2600	2590	2580	2570
1	1	58	3	2640	2600	2520	2530	2600	2620	2620	2610	2650	2660	2620	2600	2590	2590	2570	2580	2600	2610	2610	2620	2620	2620	2640	2640	2650	2640	2640	2640
1	1	58	4	3000	3020	3030	3090	3280	3340	3350	3380	3420	3460	3440	3400	3420	3480	3440	3380	3390	3350	3340	3310	3270	3220	3220	3140	3160	3150	3100	3040
1	2	38	1	2510	2190	2140	2130	2130	2130	2140	2130	2130	2120	2110	2150	2150	2140	2130	2130	2130	2130	2120	2120	2120	2120	2120	2110	2110	2110	2110	2110
1	2	38	2	2500	2400	2380	2330	2320	2300	2270	2260	2230	2230	2220	2220	2260	2230	2230	2220	2220	2230	2220	2220	2220	2220	2220	2220	2220	2220	2230	2240
1	2	38	3	2590	2580	2590	2560	2560	2590	2300	2230	2200	2210	2200	2210	2210	2200	2190	2190	2190	2190	2190	2190	2190	2190	2200	2210	2230	2240	2240	2260
1	2	38	4	2920	2950	2980	3000	3080	3250	2380	2380	2380	2380	2380	2380	2380	2380	2370	2360	2360	2360	2350	2340	2350	2340	2340	2350	2360	2360	2360	2360
2	3	38	1	2410	2220	2180	2150	2160	2160	2160	2150	2150	2140	2130	2130	2170	2150	2150	2140	2130	2130	2130	2120	2120	2120	2120	2120	2120	2120	2110	2120
2	3	38	2	2440	2360	2360	2350	2350	2350	2220	2170	2150	2150	2150	2150	2210	2160	2150	2140	2150	2150	2140	2150	2150	2150	2140	2150	2160	2160	2160	2170
2	3	38	3	2650	2610	2610	2580	2620	2630	2290	2240	2190	2180	2180	2180	2190	2170	2170	2170	2170	2180	2180	2180	2190	2190	2210	2220	2230	2230	2220	2230
2	3	38	4	3030	3070	3090	3150	3230	3330	2430	2460	2420	2410	2400	2410	2420	2410	2420	2420	2430	2430	2440	2420	2420	2420	2430	2430	2430	2430	2440	2430
2	4	28	1	2440	2260	2210	2180	2190	2180	2180	2170	2170	2160	2150	2150	2180	2170	2160	2160	2150	2150	2150	2150	2150	2140	2150	2140	2140	2130	2130	2130
2	4	28	2	2390	2290	2290	2240	2220	2190	2150	2140	2140	2130	2130	2130	2140	2130	2130	2130	2130	2130	2130	2130	2130	2130	2130	2120	2130	2130	2130	2130
2	4	28	3	2440	2420	2420	2380	2400	2400	2180	2150	2140	2130	2130	2130	2130	2130	2130	2130	2130	2130	2130	2130	2130	2130	2130	2130	2130	2130	2140	2140
2	4	28	4	2770	2780	2770	2780	2780	2820	2270	2210	2170	2160	2160	2150	2150	2140	2140	2140	2140	2140	2140	2140	2140	2150	2140	2160	2160	2170	2170	2180
3	5	28	1	2400	2220	2180	2160	2170	2170	2170	2180	2170	2160	2150	2170	2190	2160	2150	2150	2150	2150	2140	2150	2140	2140	2140	2140	2130	2130	2130	2120
3	5	28	2	2470	2380	2360	2360	2330	2330	2220	2180	2180	2170	2160	2170	2180	2170	2170	2170	2170	2170	2160	2170	2160	2170	2170	2160	2170	2160	2170	2160
3	5	28	3	2580	2570	2570	2560	2570	2590	2320	2220	2190	2190	2190	2180	2180	2180	2160	2180	2180	2180	2180	2180	2170	2180	2180	2180	2180	2180	2170	2180
3	5	28	4	3070	3140	3170	3210	3310	3370	2330	2260	2190	2180	2170	2160	2170	2160	2160	2150	2150	2150	2150	2150	2150	2150	2150	2160	2160	2170	2170	2180
3	6	48	1	2440	2260	2200	2190	2180	2190	2180	2180	2170	2170	2160	2170	2200	2190	2190	2180	2170	2170	2170	2160	2160	2160	2150	2140	2150	2140	2150	2160
3	6	48	2	2440	2400	2390	2400	2400	2410	2260	2210	2200	2200	2200	2200	2230	2210	2210	2200	2200	2200	2210	2210	2210	2220	2230	2220	2240	2260	2270	2280
3	6	48	3	2630	2590	2550	2560	2570	2620	2420	2370	2350	2360	2370	2370	2400	2390	2400	2400	2440	2380	2460	2460	2470	2470	2470	2470	2470	2470	2470	2470
3	6	48	4	2970	2960	3020	3050	3250	3360	2800	2740	2750	2710	2710	2660	2630	2630	2620	2610	2600	2600	2600	2600	2590	2600	2580	2570	2580	2600	2600	2590
4	7	38	1	2500	2270	2210	2200	2190	2190	2190	2200	2170	2170	2170	2160	2190	2180	2160	2160	2160	2150	2150	2150	2140	2140	2130	2130	2120	2130	2130	2130
4	7	38	2	2440	2390	2360	2360	2350	2360	2210	2190	2170	2160	2170	2170	2160	2170	2170	2160	2160	2160	2170	2160	2170	2170	2170	2170	2180	2190	2190	2200
4	7	38	3	2560	2550	2510	2520	2550	2590	2310	2240	2220	2220	2230	2220	2230	2220	2230	2220	2230	2220	2230	2230	2230	2240	2260	2280	2290	2290	2290	2300
4	7	38	4	2930	2930	2960	2980	3160	3290	2420	2390	2390	2390	2400	2380	2370	2370	2370	2350	2360	2360	2360	2370	2370	2370	2370	2370	2390	2390	2400	2390
4	8	58	1	2450	2280	2230	2200	2190	2190	2200	2200	2200	2210	2210	2220	2270	2260	2260	2240	2240	2240	2240	2230	2230	2220	2220	2220	2220	2220	2230	2230
4	8	58	2	2420	2350	2340	2290	2240	2240	2240	2240	2260	2270	2270	2280	2300	2280	2280	2280	2290	2290	2300	2310	2310	2310	2320	2320	2330	2340	2340	2340
4	8	58	3	2700	2630	2610	2570	2630	2680	2670	2670	2700	2710	2700	2670	2670	2660	2670	2680	2680	2680	2640	2620	2620	2620	2610	2610	2620	2610	2620	2620
4	8	58	4	2990	2990	3030	3030	3240	3310	3320	3320	3360	3370	3380	3390	3390	3440	3460	3450	3420	3270	3180	3150	3210	3140	3130	3140	3110	3100	3090	3070
5	9	28	1	2360	2200	2160	2170	2170	2170	2170	2160	2150	2140	2130	2130	2160	2140	2130	2130	2130	2120	2120	2120	2120	2120	2120	2110	2110	2110	2110	2110
5	9	28	2	2430	2330	2300	2320	2300	2310	2180	2150	2140	2130	2130	2130	2150	2140	2130	2130	2130	2130	2130	2130	2130	2130	2130	2130	2130	2130	2120	2130
5	9	28	3	2670	2610	2580	2590	2610	2640	2350	2230	2210	2210	2200	2200	2200	2200	2200	2200	2200	2190	2190	2190	2190	2190	2190	2190	2190	2190	2190	2200
5	9	28	4	3020	3020	2990	3030	3180	3240	2320	2240	2200	2190	2180	2180	2180	2160	2170	2150	2150	2140	2140	2150	2140	2140	2150	2140	2150	2160	2160	2170
5	10	58	1	2310	2170	2130	2120	2150	2150	2150	2150	2130	2140	2130	2140	2160	2160	2150	2140	2140	2140	2130	2130	2130	2130	2130	2120	2130	2120	2130	2120
5	10	58	2	2420	2340	2330	2310	2310	2320	2310	2310	2300	2300	2310	2310	2330	2320	2320	2330	2330	2330	2330	2330	2340	2350	2350	2350	2350	2350	2350	2350
5	10	58	3	2570	2490	2470	2460	2530	2550	2490	2520	2510	2520	2530	2550	2560	2550	2520	2530	2530	2530	2550	2530	2530	2530	2530	2530	2530	2530	2530	2550
5	10	58	4	3090	3030	3010	3040	3140	3180	3130	3160	3170	3180	3220	3210	3070	3000	2970	2960	2960	2930	2930	2920	2910	2910	2920	2930	2920	2920	2920	2900
1	11	48	1	2400	2230	2170	2170	2160	2160	2150	2150	2140	2140	2140	2140	2160	2150	2150	2150	2140	2140	2130	2140	2130	2140	2130	2130	2130	2130	2130	2130
1	11	48	2	2400	2330	2300	2300	2300	2300	2190	2160	2150	2150	2160	2160	2190	2170	2170	2170	2170	2170	2180	2180	2190	2190	2190	2190	2200	2200	2210	2220
1	11	48	3	2620	2550	2500	2490	2500	2570	2360	2360	2370	2370	2380	2370	2370	2350	2340	2340	2340	2350	2350	2350	2350	2340	2350	2360	2360	2360	2360	2370
1	11	48	4	2870	2880	2880	2910	3030	3190	2780	2760	2750	2730	2690	2650	2610	2580	2570	2530	2570	2560	2560	2550	2550	2530	2530	2530	2520	2520	2520	2530
1	12	28	1	2390	2210	2160	2150	2150	2170	2160	2150	2150	2140	2130	2130	2150	2150	2140	2150	2140	2130	2130	2130	2120	2120	2120	2120	2120	2120	2110	2110
1	12	28	2	2420	2330	2320	2320	2310	2320	2180	2160	2150	2140	2140	2140	2150	2140	2140	2140	2140	2140	2140	2130	2130	2130	2130	2130	2130	2140	2140	2130
1	12	28	3	2530	2530	2510	2560	2620	2630	2280	2180	2150	2140	2140	2130	2140	2130	2130	2130	2130	2130	2130	2130	2130	2130	2130	2130	2130	2130	2140	2140
1	12	28	4	3030	3070	3090	3150	3250	3300	2290	2260	2190	2160	2150	2150	2150	2140	2150	2140	2140	2140	2140	2140	2150	2150	2150	2160	2160	2170	2180	2190
2	13	48	1	2440	2240	2210	2190	2190	2190	2190	2180	2180	2180	2180	2180	2210	2210	2210	2200	2200	2190	2190	2180	2180	2170	2160	2160	2160	2170	2170	2160
2	13	48	2	2460	2330	2310	2260	2230	2220	2170	2160	2150	2150	2150	2140	2170	2150	2150	2150	2160	2150	2160	2160	2160	2170	2170	2170	2170	2180	2180	2190
2	13	48	3	2520	2480	2470	2440	2470	2500	2340	2330	2340	2340	2360	2370	2380	2380	2380	2400	2410	2420	2420	2430	2440	2440	2440	2430	2430	2440	2430	2420
2	13	48	4	2920	2900	2990	2970	3130	3180	2590	2570	2580	2580	2600	2580	2530	2510	2520	2530	2530	2530	2520	2510	2510	2510	2500	2510	2500	2500	2490	2490
2	14	58	1	2440	2270	2200	2190	2190	2180	2190	2190	2190	2200	2210	2210	2240	2230	2230	2220	2220	2220	2210	2210	2210	2210	2210	2210	2210	2210	2220	2230
2	14	58	2	2380	2350	2310	2300	2320	2340	2330	2320	2340	2360	2360	2370	2370	2350	2360	2370	2370	2370	2380	2390	2400	2400	2400	2400	2400	2400	2400	2400
2	14	58	3	2620	2550	2470	2470	2490	2520	2520	2520	2580	2560	2550	2550	2510	2520	2510	2510	2520	2520	2560	2580	2580	2570	2570	2560	2520	2530	2520	2510
2	14	58	4	2820	2840	2870	2880	2970	3080	3110	3160	3130	3090	3080	3050	3030	3030	3020	3040	3060	3080	3130	3130	3100	3080	3030	2990	2990	3000	2990	2970
3	15	38	1	2470	2230	2170	2170	2160	2170	2170	2160	2160	2150	2150	2150	2180	2170	2160	2160	2150	2150	2150	2150	2140	2140	2140	2130	2130	2130	2130	2130
3	15	38	2	2430	2360	2360	2350	2330	2340	2200	2150	2140	2150	2130	2130	2140	2130	2140	2140	2130	2140	2140	2130	2130	2140	2140	2130	2140	2140	2140	2150
3	15	38	3	2610	2580	2600	2520	2560	2600	2330	2230	2220	2220	2220	2210	2220	2210	2210	2220	2220	2220	2220	2220	2230	2240	2240	2260	2270	2280	2290	2300
3	15	38	4	3010	3030	3090	3110	3300	3380	2370	2340	2360	2350	2360	2360	2370	2370	2380	2380	2390	2400	2420	2430	2450	2450	2460	2470	2460	2470	2460	2460
3	16	58	1	2430	2260	2200	2180	2180	2180	2190	2180	2180	2180	2190	2180	2210	2200	2200	2210	2200	2200	2190	2180	2180	2180	2170	2170	2170	2170	2170	2170
3	16	58	2	2480	2360	2350	2300	2260	2260	2260	2260	2260	2270	2280	2280	2290	2280	2280	2290	2290	2290	2300	2300	2310	2320	2310	2320	2330	2350	2350	2360
3	16	58	3	2500	2470	2450	2470	2500	2500	2500	2510	2530	2530	2560	2560	2520	2500	2510	2490	2500	2500	2490	2490	2480	2480	2480	2470	2480	2480	2480	2490
3	16	58	4	3020	2990	3050	3050	3210	3270	3260	3270	3290	3340	3390	2880	3030	3270	3250	3220	3230	3220	3190	3130	3070	3070	3050	3040	3030	3030	3000	2980
4	17	48	1	2400	2230	2190	2190	2190	2180	2180	2170	2170	2160	2160	2160	2190	2180	2170	2170	2170	2160	2170	2160	2150	2160	2150	2150	2150	2150	2150	2150
4	17	48	2	2440	2360	2340	2360	2330	2340	2280	2240	2200	2190	2180	2180	2220	2200	2200	2200	2200	2200	2210	2210	2220	2220	2220	2230	2260	2270	2270	2290
4	17	48	3	2640	2550	2490	2500	2500	2510	2390	2380	2340	2340	2360	2380	2400	2410	2400	2390	2400	2400	2420	2410	2410	2400	2400	2410	2400	2410	2420	2420
4	17	48	4	2760	2760	2770	2790	2810	2870	2760	2740	2670	2640	2700	2720	2750	2730	2690	2700	2700	2700	2690	2660	2630	2630	2620	2630	2600	2630	2640	2630
4	18	28	1	2340	2210	2160	2130	2150	2120	2150	2120	2120	2110	2110	2110	2130	2120	2120	2120	2120	2110	2110	2100	2100	2110	2110	2100	2100	2100	2100	2090
4	18	28	2	2460	2380	2350	2350	2340	2340	2200	2170	2160	2140	2140	2140	2160	2150	2150	2150	2150	2150	2150	2140	2140	2140	2140	2140	2140	2140	2150	2150
4	18	28	3	2680	2580	2530	2530	2570	2590	2280	2190	2170	2160	2160	2150	2160	2150	2150	2160	2150	2150	2150	2150	2150	2150	2150	2150	2150	2150	2150	2160
4	18	28	4	3090	3060	3110	3160	3250	3290	2300	2240	2190	2170	2170	2170	2160	2150	2150	2150	2150	2150	2150	2150	2150	2160	2160	2160	2170	2180	2190	2190
5	19	38	1	2340	2220	2180	2160	2170	2160	2180	2160	2160	2150	2150	2140	2170	2160	2150	2160	2150	2140	2150	2140	2130	2120	2120	2120	2120	2120	2120	2110
5	19	38	2	2400	2320	2310	2300	2290	2300	2180	2150	2130	2130	2130	2130	2150	2140	2140	2130	2130	2130	2130	2130	2130	2130	2130	2140	2140	2150	2150	2160
5	19	38	3	2520	2500	2490	2480	2490	2510	2240	2180	2150	2150	2150	2140	2150	2140	2140	2140	2140	2140	2150	2160	2160	2160	2170	2180	2190	2200	2200	2210
5	19	38	4	3030	3070	3100	3130	3290	3380	2420	2390	2340	2350	2340	2340	2350	2360	2360	2360	2370	2390	2390	2410	2420	2430	2440	2410	2360	2450	2450	2430
5	20	48	1	2370	2180	2150	2130	2130	2130	2130	2130	2130	2140	2140	2140	2160	2170	2160	2160	2150	2150	2150	2140	2140	2130	2130	2130	2130	2130	2130	2130
5	20	48	2	2440	2360	2350	2330	2290	2300	2270	2260	2230	2220	2210	2210	2230	2220	2220	2220	2210	2210	2210	2210	2210	2210	2220	2220	2230	2230	2230	2240
5	20	48	3	2530	2500	2510	2480	2480	2490	2330	2240	2220	2230	2260	2230	2240	2240	2260	2270	2280	2280	2290	2300	2320	2320	2330	2340	2350	2360	2360	2380
5	20	48	4	3070	3080	3150	3170	3220	3250	2700	2620	2630	2630	2650	2650	2680	2700	2730	2740	2730	2730	2730	2730	2710	2710	2700	2680	2680	2670	2670	2640
Block	Pot	Treatment	Port	0 DAP	7 DAP	14 DAP	21 DAP	28 DAP	31 DAP	32 DAP	33 DAP	35 DAP	38 DAP	41 DAP	44 DAP	47 DAP	50 DAP	53 DAP	56 DAP	58 DAP	60 DAP	62 DAP	65 DAP	68 DAP	71 DAP	74 DAP	77 DAP	80 DAP	83 DAP	86 DAP	5 DPH
1	1	58	1	32.0789	21.7556	16.03	17.0739	17.0739	18.0802	18.0802	19.9853	18.0802	18.0802	18.0802	18.0802	19.9853	18.0802	17.0739	17.0739	17.0739	17.0739	16.03	16.03	16.03	14.947	14.947	14.947	14.947	16.03	14.947	16.03
1	1	58	2	35.3663	32.5445	31.5959	32.5445	31.5959	32.5445	32.9933	32.9933	32.9933	33.8431	34.2451	34.2451	36.3707	35.7135	36.0481	37.2704	37.8174	38.3257	39.0215	39.237	39.237	39.237	39.237	39.237	39.4446	39.237	39.0215	38.7981
1	1	58	3	40.2031	39.4446	37.5489	37.8174	39.4446	39.8378	39.8378	39.6448	40.376	40.5426	39.8378	39.4446	39.237	39.237	38.7981	39.0215	39.4446	39.6448	39.6448	39.8378	39.8378	39.8378	40.2031	40.2031	40.376	40.2031	40.2031	40.2031
1	1	58	4	43.7201	43.8107	43.8536	44.0801	44.542	44.6325	44.6457	44.6827	44.726	44.7634	44.7454	44.7051	44.726	44.7802	44.7454	44.6827	44.6941	44.6457	44.6325	44.5897	44.5249	44.4292	44.4292	44.2344	44.2885	44.2619	44.1133	43.8949
1	2	38	1	37.2704	19.9853	14.947	13.8236	13.8236	13.8236	14.947	13.8236	13.8236	12.6581	11.4491	16.03	16.03	14.947	13.8236	13.8236	13.8236	13.8236	12.6581	12.6581	12.6581	12.6581	12.6581	11.4491	11.4491	11.4491	11.4491	11.4491
1	2	38	2	36.9814	33.426	32.5445	30.0358	29.4764	28.2941	26.3497	25.6525	23.4007	23.4007	22.5932	22.5932	25.6525	23.4007	23.4007	22.5932	22.5932	23.4007	22.5932	22.5932	22.5932	22.5932	22.5932	22.5932	22.5932	22.5932	23.4007	24.179
1	2	38	3	39.237	39.0215	39.237	38.5662	38.5662	39.237	28.2941	23.4007	20.8867	21.7556	20.8867	21.7556	21.7556	20.8867	19.9853	19.9853	19.9853	19.9853	19.9853	19.9853	19.9853	19.9853	20.8867	21.7556	23.4007	24.179	24.179	25.6525
1	2	38	4	43.2834	43.4623	43.6226	43.7201	44.0458	44.4887	32.5445	32.5445	32.5445	32.5445	32.5445	32.5445	32.5445	32.5445	32.0789	31.5959	31.5959	31.5959	31.0948	30.575	31.0948	30.575	30.575	31.0948	31.5959	31.5959	31.5959	31.5959
2	3	38	1	33.8431	22.5932	19.0502	16.03	17.0739	17.0739	17.0739	16.03	16.03	14.947	13.8236	13.8236	18.0802	16.03	16.03	14.947	13.8236	13.8236	13.8236	12.6581	12.6581	12.6581	12.6581	12.6581	12.6581	12.6581	11.4491	12.6581
2	3	38	2	35.0062	31.5959	31.5959	31.0948	31.0948	31.0948	22.5932	18.0802	16.03	16.03	16.03	16.03	21.7556	17.0739	16.03	14.947	16.03	16.03	14.947	16.03	16.03	16.03	14.947	16.03	17.0739	17.0739	17.0739	18.0802
2	3	38	3	40.376	39.6448	39.6448	39.0215	39.8378	40.0238	27.6696	24.179	19.9853	19.0502	19.0502	19.0502	19.9853	18.0802	18.0802	18.0802	18.0802	19.0502	19.0502	19.0502	19.9853	19.9853	21.7556	22.5932	23.4007	23.4007	22.5932	23.4007
2	3	38	4	43.8536	44.0101	44.0801	44.2619	44.4497	44.6188	34.6326	35.7135	34.2451	33.8431	33.426	33.8431	34.2451	33.8431	34.2451	34.2451	34.6326	34.6326	35.0062	34.2451	34.2451	34.2451	34.6326	34.6326	34.6326	34.6326	35.0062	34.6326
2	4	28	1	35.0062	25.6525	21.7556	19.0502	19.9853	19.0502	19.0502	18.0802	18.0802	17.0739	16.03	16.03	19.0502	18.0802	17.0739	17.0739	16.03	16.03	16.03	16.03	16.03	14.947	16.03	14.947	14.947	13.8236	13.8236	13.8236
2	4	28	2	32.9933	27.6696	27.6696	24.179	22.5932	19.9853	16.03	14.947	14.947	13.8236	13.8236	13.8236	14.947	13.8236	13.8236	13.8236	13.8236	13.8236	13.8236	13.8236	13.8236	13.8236	13.8236	12.6581	13.8236	13.8236	13.8236	13.8236
2	4	28	3	35.0062	34.2451	34.2451	32.5445	33.426	33.426	19.0502	16.03	14.947	13.8236	13.8236	13.8236	13.8236	13.8236	13.8236	13.8236	13.8236	13.8236	13.8236	13.8236	13.8236	13.8236	13.8236	13.8236	13.8236	13.8236	14.947	14.947
2	4	28	4	42.0232	42.1304	42.0232	42.1304	42.1304	42.5222	26.3497	21.7556	18.0802	17.0739	17.0739	16.03	16.03	14.947	14.947	14.947	14.947	14.947	14.947	14.947	14.947	16.03	14.947	17.0739	17.0739	18.0802	18.0802	19.0502
3	5	28	1	33.426	22.5932	19.0502	17.0739	18.0802	18.0802	18.0802	19.0502	18.0802	17.0739	16.03	18.0802	19.9853	17.0739	16.03	16.03	16.03	16.03	14.947	16.03	14.947	14.947	14.947	14.947	13.8236	13.8236	13.8236	12.6581
3	5	28	2	36.0481	32.5445	31.5959	31.5959	30.0358	30.0358	22.5932	19.0502	19.0502	18.0802	17.0739	18.0802	19.0502	18.0802	18.0802	18.0802	18.0802	18.0802	17.0739	18.0802	17.0739	18.0802	18.0802	17.0739	18.0802	17.0739	18.0802	17.0739
3	5	28	3	39.0215	38.7981	38.7981	38.5662	38.7981	39.237	29.4764	22.5932	19.9853	19.9853	19.9853	19.0502	19.0502	19.0502	17.0739	19.0502	19.0502	19.0502	19.0502	19.0502	18.0802	19.0502	19.0502	19.0502	19.0502	19.0502	18.0802	19.0502
3	5	28	4	44.0101	44.2344	44.3142	44.4078	44.5897	44.6708	30.0358	25.6525	19.9853	19.0502	18.0802	17.0739	18.0802	17.0739	17.0739	16.03	16.03	16.03	16.03	16.03	16.03	16.03	16.03	17.0739	17.0739	18.0802	18.0802	19.0502
3	6	48	1	35.0062	25.6525	20.8867	19.9853	19.0502	19.9853	19.0502	19.0502	18.0802	18.0802	17.0739	18.0802	20.8867	19.9853	19.9853	19.0502	18.0802	18.0802	18.0802	17.0739	17.0739	17.0739	16.03	14.947	16.03	14.947	16.03	17.0739
3	6	48	2	35.0062	33.426	32.9933	33.426	33.426	33.8431	25.6525	21.7556	20.8867	20.8867	20.8867	20.8867	23.4007	21.7556	21.7556	20.8867	20.8867	20.8867	21.7556	21.7556	21.7556	22.5932	23.4007	22.5932	24.179	25.6525	26.3497	27.0218
3	6	48	3	40.0238	39.237	38.3257	38.5662	38.7981	39.8378	34.2451	32.0789	31.0948	31.5959	32.0789	32.0789	33.426	32.9933	33.426	33.426	35.0062	32.5445	35.7135	35.7135	36.0481	36.0481	36.0481	36.0481	36.0481	36.0481	36.0481	36.0481
3	6	48	4	43.5712	43.5177	43.8107	43.9347	44.4887	44.6585	42.3335	41.6767	41.7964	41.2899	41.2899	40.5426	40.0238	40.0238	39.8378	39.6448	39.4446	39.4446	39.4446	39.4446	39.237	39.4446	39.0215	38.7981	39.0215	39.4446	39.4446	39.237
4	7	38	1	36.9814	26.3497	21.7556	20.8867	19.9853	19.9853	19.9853	20.8867	18.0802	18.0802	18.0802	17.0739	19.9853	19.0502	17.0739	17.0739	17.0739	16.03	16.03	16.03	14.947	14.947	13.8236	13.8236	12.6581	13.8236	13.8236	13.8236
4	7	38	2	35.0062	32.9933	31.5959	31.5959	31.0948	31.5959	21.7556	19.9853	18.0802	17.0739	18.0802	18.0802	17.0739	18.0802	18.0802	17.0739	17.0739	17.0739	18.0802	17.0739	18.0802	18.0802	18.0802	18.0802	19.0502	19.9853	19.9853	20.8867
4	7	38	3	38.5662	38.3257	37.2704	37.5489	38.3257	39.237	28.8961	24.179	22.5932	22.5932	23.4007	22.5932	23.4007	22.5932	23.4007	22.5932	23.4007	22.5932	23.4007	23.4007	23.4007	24.179	25.6525	27.0218	27.6696	27.6696	27.6696	28.2941
4	7	38	4	43.3452	43.3452	43.5177	43.6226	44.2885	44.5585	34.2451	32.9933	32.9933	32.9933	33.426	32.5445	32.0789	32.0789	32.0789	31.0948	31.5959	31.5959	31.5959	32.0789	32.0789	32.0789	32.0789	32.0789	32.9933	32.9933	33.426	32.9933
4	8	58	1	35.3663	27.0218	23.4007	20.8867	19.9853	19.9853	20.8867	20.8867	20.8867	21.7556	21.7556	22.5932	26.3497	25.6525	25.6525	24.179	24.179	24.179	24.179	23.4007	23.4007	22.5932	22.5932	22.5932	22.5932	22.5932	23.4007	23.4007
4	8	58	2	34.2451	31.0948	30.575	27.6696	24.179	24.179	24.179	24.179	25.6525	26.3497	26.3497	27.0218	28.2941	27.0218	27.0218	27.0218	27.6696	27.6696	28.2941	28.8961	28.8961	28.8961	29.4764	29.4764	30.0358	30.575	30.575	30.575
4	8	58	3	41.1512	40.0238	39.6448	38.7981	40.0238	40.8581	40.7032	40.7032	41.1512	41.2899	41.1512	40.7032	40.7032	40.5426	40.7032	40.8581	40.8581	40.8581	40.2031	39.8378	39.8378	39.8378	39.6448	39.6448	39.8378	39.6448	39.8378	39.8378
4	8	58	4	43.6723	43.6723	43.8536	43.8536	44.4696	44.5897	44.6045	44.6045	44.6585	44.6708	44.6827	44.6941	44.6941	44.7454	44.7634	44.7546	44.726	44.5249	44.3389	44.2619	44.4078	44.2344	44.2057	44.2344	44.1452	44.1133	44.0801	44.0101
5	9	28	1	31.5959	20.8867	17.0739	18.0802	18.0802	18.0802	18.0802	17.0739	16.03	14.947	13.8236	13.8236	17.0739	14.947	13.8236	13.8236	13.8236	12.6581	12.6581	12.6581	12.6581	12.6581	12.6581	11.4491	11.4491	11.4491	11.4491	11.4491
5	9	28	2	34.6326	30.0358	28.2941	29.4764	28.2941	28.8961	19.0502	16.03	14.947	13.8236	13.8236	13.8236	16.03	14.947	13.8236	13.8236	13.8236	13.8236	13.8236	13.8236	13.8236	13.8236	13.8236	13.8236	13.8236	13.8236	12.6581	13.8236
5	9	28	3	40.7032	39.6448	39.0215	39.237	39.6448	40.2031	31.0948	23.4007	21.7556	21.7556	20.8867	20.8867	20.8867	20.8867	20.8867	20.8867	20.8867	19.9853	19.9853	19.9853	19.9853	19.9853	19.9853	19.9853	19.9853	19.9853	19.9853	20.8867
5	9	28	4	43.8107	43.8107	43.6723	43.8536	44.3389	44.4696	29.4764	24.179	20.8867	19.9853	19.0502	19.0502	19.0502	17.0739	18.0802	16.03	16.03	14.947	14.947	16.03	14.947	14.947	16.03	14.947	16.03	17.0739	17.0739	18.0802
5	10	58	1	28.8961	18.0802	13.8236	12.6581	16.03	16.03	16.03	16.03	13.8236	14.947	13.8236	14.947	17.0739	17.0739	16.03	14.947	14.947	14.947	13.8236	13.8236	13.8236	13.8236	13.8236	12.6581	13.8236	12.6581	13.8236	12.6581
5	10	58	2	34.2451	30.575	30.0358	28.8961	28.8961	29.4764	28.8961	28.8961	28.2941	28.2941	28.8961	28.8961	30.0358	29.4764	29.4764	30.0358	30.0358	30.0358	30.0358	30.0358	30.575	31.0948	31.0948	31.0948	31.0948	31.0948	31.0948	31.0948
5	10	58	3	38.7981	36.6817	36.0481	35.7135	37.8174	38.3257	36.6817	37.5489	37.2704	37.5489	37.8174	38.3257	38.5662	38.3257	37.5489	37.8174	37.8174	37.8174	38.3257	37.8174	37.8174	37.8174	37.8174	37.8174	37.8174	37.8174	37.8174	38.3257
5	10	58	4	44.0801	43.8536	43.7662	43.8949	44.2344	44.3389	44.2057	44.2885	44.3142	44.3389	44.4292	44.4078	44.0101	43.7201	43.5712	43.5177	43.5177	43.3452	43.3452	43.2834	43.2192	43.2192	43.2834	43.3452	43.2834	43.2834	43.2834	43.1526
1	11	48	1	33.426	23.4007	18.0802	18.0802	17.0739	17.0739	16.03	16.03	14.947	14.947	14.947	14.947	17.0739	16.03	16.03	16.03	14.947	14.947	13.8236	14.947	13.8236	14.947	13.8236	13.8236	13.8236	13.8236	13.8236	13.8236
1	11	48	2	33.426	30.0358	28.2941	28.2941	28.2941	28.2941	19.9853	17.0739	16.03	16.03	17.0739	17.0739	19.9853	18.0802	18.0802	18.0802	18.0802	18.0802	19.0502	19.0502	19.9853	19.9853	19.9853	19.9853	20.8867	20.8867	21.7556	22.5932
1	11	48	3	39.8378	38.3257	36.9814	36.6817	36.9814	38.7981	31.5959	31.5959	32.0789	32.0789	32.5445	32.0789	32.0789	31.0948	30.575	30.575	30.575	31.0948	31.0948	31.0948	31.0948	30.575	31.0948	31.5959	31.5959	31.5959	31.5959	32.0789
1	11	48	4	42.9376	43.0119	43.0119	43.2192	43.8536	44.3627	42.1304	41.9119	41.7964	41.5525	41.0073	40.376	39.6448	39.0215	38.7981	37.8174	38.7981	38.5662	38.5662	38.3257	38.3257	37.8174	37.8174	37.8174	37.5489	37.5489	37.5489	37.8174
1	12	28	1	32.9933	21.7556	17.0739	16.03	16.03	18.0802	17.0739	16.03	16.03	14.947	13.8236	13.8236	16.03	16.03	14.947	16.03	14.947	13.8236	13.8236	13.8236	12.6581	12.6581	12.6581	12.6581	12.6581	12.6581	11.4491	11.4491
1	12	28	2	34.2451	30.0358	29.4764	29.4764	28.8961	29.4764	19.0502	17.0739	16.03	14.947	14.947	14.947	16.03	14.947	14.947	14.947	14.947	14.947	14.947	13.8236	13.8236	13.8236	13.8236	13.8236	13.8236	14.947	14.947	13.8236
1	12	28	3	37.8174	37.8174	37.2704	38.5662	39.8378	40.0238	27.0218	19.0502	16.03	14.947	14.947	13.8236	14.947	13.8236	13.8236	13.8236	13.8236	13.8236	13.8236	13.8236	13.8236	13.8236	13.8236	13.8236	13.8236	13.8236	14.947	14.947
1	12	28	4	43.8536	44.0101	44.0801	44.2619	44.4887	44.5744	27.6696	25.6525	19.9853	17.0739	16.03	16.03	16.03	14.947	16.03	14.947	14.947	14.947	14.947	14.947	16.03	16.03	16.03	17.0739	17.0739	18.0802	19.0502	19.9853
2	13	48	1	35.0062	24.179	21.7556	19.9853	19.9853	19.9853	19.9853	19.0502	19.0502	19.0502	19.0502	19.0502	21.7556	21.7556	21.7556	20.8867	20.8867	19.9853	19.9853	19.0502	19.0502	18.0802	17.0739	17.0739	17.0739	18.0802	18.0802	17.0739
2	13	48	2	35.7135	30.0358	28.8961	25.6525	23.4007	22.5932	18.0802	17.0739	16.03	16.03	16.03	14.947	18.0802	16.03	16.03	16.03	17.0739	16.03	17.0739	17.0739	17.0739	18.0802	18.0802	18.0802	18.0802	19.0502	19.0502	19.9853
2	13	48	3	37.5489	36.3707	36.0481	35.0062	36.0481	36.9814	30.575	30.0358	30.575	30.575	31.5959	32.0789	32.5445	32.5445	32.5445	33.426	33.8431	34.2451	34.2451	34.6326	35.0062	35.0062	35.0062	34.6326	34.6326	35.0062	34.6326	34.2451
2	13	48	4	43.2834	43.1526	43.6723	43.5712	44.2057	44.3389	39.237	38.7981	39.0215	39.0215	39.4446	39.0215	37.8174	37.2704	37.5489	37.8174	37.8174	37.8174	37.5489	37.2704	37.2704	37.2704	36.9814	37.2704	36.9814	36.9814	36.6817	36.6817
2	14	58	1	35.0062	26.3497	20.8867	19.9853	19.9853	19.0502	19.9853	19.9853	19.9853	20.8867	21.7556	21.7556	24.179	23.4007	23.4007	22.5932	22.5932	22.5932	21.7556	21.7556	21.7556	21.7556	21.7556	21.7556	21.7556	21.7556	22.5932	23.4007
2	14	58	2	32.5445	31.0948	28.8961	28.2941	29.4764	30.575	30.0358	29.4764	30.575	31.5959	31.5959	32.0789	32.0789	31.0948	31.5959	32.0789	32.0789	32.0789	32.5445	32.9933	33.426	33.426	33.426	33.426	33.426	33.426	33.426	33.426
2	14	58	3	39.8378	38.3257	36.0481	36.0481	36.6817	37.5489	37.5489	37.5489	39.0215	38.5662	38.3257	38.3257	37.2704	37.5489	37.2704	37.2704	37.5489	37.5489	38.5662	39.0215	39.0215	38.7981	38.7981	38.5662	37.5489	37.8174	37.5489	37.2704
2	14	58	4	42.5222	42.6976	42.9376	43.0119	43.5712	44.0458	44.1452	44.2885	44.2057	44.0801	44.0458	43.9347	43.8536	43.8536	43.8107	43.8949	43.9731	44.0458	44.2057	44.2057	44.1133	44.0458	43.8536	43.6723	43.6723	43.7201	43.6723	43.5712
3	15	38	1	36.0481	23.4007	18.0802	18.0802	17.0739	18.0802	18.0802	17.0739	17.0739	16.03	16.03	16.03	19.0502	18.0802	17.0739	17.0739	16.03	16.03	16.03	16.03	14.947	14.947	14.947	13.8236	13.8236	13.8236	13.8236	13.8236
3	15	38	2	34.6326	31.5959	31.5959	31.0948	30.0358	30.575	20.8867	16.03	14.947	16.03	13.8236	13.8236	14.947	13.8236	14.947	14.947	13.8236	14.947	14.947	13.8236	13.8236	14.947	14.947	13.8236	14.947	14.947	14.947	16.03
3	15	38	3	39.6448	39.0215	39.4446	37.5489	38.5662	39.4446	30.0358	23.4007	22.5932	22.5932	22.5932	21.7556	22.5932	21.7556	21.7556	22.5932	22.5932	22.5932	22.5932	22.5932	23.4007	24.179	24.179	25.6525	26.3497	27.0218	27.6696	28.2941
3	15	38	4	43.7662	43.8536	44.0801	44.1452	44.5744	44.6827	32.0789	30.575	31.5959	31.0948	31.5959	31.5959	32.0789	32.0789	32.5445	32.5445	32.9933	33.426	34.2451	34.6326	35.3663	35.3663	35.7135	36.0481	35.7135	36.0481	35.7135	35.7135
3	16	58	1	34.6326	25.6525	20.8867	19.0502	19.0502	19.0502	19.9853	19.0502	19.0502	19.0502	19.9853	19.0502	21.7556	20.8867	20.8867	21.7556	20.8867	20.8867	19.9853	19.0502	19.0502	19.0502	18.0802	18.0802	18.0802	18.0802	18.0802	18.0802
3	16	58	2	36.3707	31.5959	31.0948	28.2941	25.6525	25.6525	25.6525	25.6525	25.6525	26.3497	27.0218	27.0218	27.6696	27.0218	27.0218	27.6696	27.6696	27.6696	28.2941	28.2941	28.8961	29.4764	28.8961	29.4764	30.0358	31.0948	31.0948	31.5959
3	16	58	3	36.9814	36.0481	35.3663	36.0481	36.9814	36.9814	36.9814	37.2704	37.8174	37.8174	38.5662	38.5662	37.5489	36.9814	37.2704	36.6817	36.9814	36.9814	36.6817	36.6817	36.3707	36.3707	36.3707	36.0481	36.3707	36.3707	36.3707	36.6817
3	16	58	4	43.8107	43.6723	43.9347	43.9347	44.4078	44.5249	44.5071	44.5249	44.5585	44.6325	44.6941	43.0119	43.8536	44.5249	44.4887	44.4292	44.4497	44.4292	44.3627	44.2057	44.0101	44.0101	43.9347	43.8949	43.8536	43.8536	43.7201	43.6226
4	17	48	1	33.426	23.4007	19.9853	19.9853	19.9853	19.0502	19.0502	18.0802	18.0802	17.0739	17.0739	17.0739	19.9853	19.0502	18.0802	18.0802	18.0802	17.0739	18.0802	17.0739	16.03	17.0739	16.03	16.03	16.03	16.03	16.03	16.03
4	17	48	2	35.0062	31.5959	30.575	31.5959	30.0358	30.575	27.0218	24.179	20.8867	19.9853	19.0502	19.0502	22.5932	20.8867	20.8867	20.8867	20.8867	20.8867	21.7556	21.7556	22.5932	22.5932	22.5932	23.4007	25.6525	26.3497	26.3497	27.6696
4	17	48	3	40.2031	38.3257	36.6817	36.9814	36.9814	37.2704	32.9933	32.5445	30.575	30.575	31.5959	32.5445	33.426	33.8431	33.426	32.9933	33.426	33.426	34.2451	33.8431	33.8431	33.426	33.426	33.8431	33.426	33.8431	34.2451	34.2451
4	17	48	4	41.9119	41.9119	42.0232	42.2338	42.4296	42.9376	41.9119	41.6767	40.7032	40.2031	41.1512	41.4236	41.7964	41.5525	41.0073	41.1512	41.1512	41.1512	41.0073	40.5426	40.0238	40.0238	39.8378	40.0238	39.4446	40.0238	40.2031	40.0238
4	18	28	1	30.575	21.7556	17.0739	13.8236	16.03	12.6581	16.03	12.6581	12.6581	11.4491	11.4491	11.4491	13.8236	12.6581	12.6581	12.6581	12.6581	11.4491	11.4491	10.195	10.195	11.4491	11.4491	10.195	10.195	10.195	10.195	8.89388
4	18	28	2	35.7135	32.5445	31.0948	31.0948	30.575	30.575	20.8867	18.0802	17.0739	14.947	14.947	14.947	17.0739	16.03	16.03	16.03	16.03	16.03	16.03	14.947	14.947	14.947	14.947	14.947	14.947	14.947	16.03	16.03
4	18	28	3	40.8581	39.0215	37.8174	37.8174	38.7981	39.237	27.0218	19.9853	18.0802	17.0739	17.0739	16.03	17.0739	16.03	16.03	17.0739	16.03	16.03	16.03	16.03	16.03	16.03	16.03	16.03	16.03	16.03	16.03	17.0739
4	18	28	4	44.0801	43.9731	44.1452	44.2885	44.4887	44.5585	28.2941	24.179	19.9853	18.0802	18.0802	18.0802	17.0739	16.03	16.03	16.03	16.03	16.03	16.03	16.03	16.03	17.0739	17.0739	17.0739	18.0802	19.0502	19.9853	19.9853
5	19	38	1	30.575	22.5932	19.0502	17.0739	18.0802	17.0739	19.0502	17.0739	17.0739	16.03	16.03	14.947	18.0802	17.0739	16.03	17.0739	16.03	14.947	16.03	14.947	13.8236	12.6581	12.6581	12.6581	12.6581	12.6581	12.6581	11.4491
5	19	38	2	33.426	29.4764	28.8961	28.2941	27.6696	28.2941	19.0502	16.03	13.8236	13.8236	13.8236	13.8236	16.03	14.947	14.947	13.8236	13.8236	13.8236	13.8236	13.8236	13.8236	13.8236	13.8236	14.947	14.947	16.03	16.03	17.0739
5	19	38	3	37.5489	36.9814	36.6817	36.3707	36.6817	37.2704	24.179	19.0502	16.03	16.03	16.03	14.947	16.03	14.947	14.947	14.947	14.947	14.947	16.03	17.0739	17.0739	17.0739	18.0802	19.0502	19.9853	20.8867	20.8867	21.7556
5	19	38	4	43.8536	44.0101	44.1133	44.2057	44.5585	44.6827	34.2451	32.9933	30.575	31.0948	30.575	30.575	31.0948	31.5959	31.5959	31.5959	32.0789	32.9933	32.9933	33.8431	34.2451	34.6326	35.0062	33.8431	31.5959	35.3663	35.3663	34.6326
5	20	48	1	32.0789	19.0502	16.03	13.8236	13.8236	13.8236	13.8236	13.8236	13.8236	14.947	14.947	14.947	17.0739	18.0802	17.0739	17.0739	16.03	16.03	16.03	14.947	14.947	13.8236	13.8236	13.8236	13.8236	13.8236	13.8236	13.8236
5	20	48	2	35.0062	31.5959	31.0948	30.0358	27.6696	28.2941	26.3497	25.6525	23.4007	22.5932	21.7556	21.7556	23.4007	22.5932	22.5932	22.5932	21.7556	21.7556	21.7556	21.7556	21.7556	21.7556	22.5932	22.5932	23.4007	23.4007	23.4007	24.179
5	20	48	3	37.8174	36.9814	37.2704	36.3707	36.3707	36.6817	30.0358	24.179	22.5932	23.4007	25.6525	23.4007	24.179	24.179	25.6525	26.3497	27.0218	27.0218	27.6696	28.2941	29.4764	29.4764	30.0358	30.575	31.0948	31.5959	31.5959	32.5445
5	20	48	4	44.0101	44.0458	44.2619	44.3142	44.4292	44.4887	41.1512	39.8378	40.0238	40.0238	40.376	40.376	40.8581	41.1512	41.5525	41.6767	41.5525	41.5525	41.5525	41.5525	41.2899	41.2899	41.1512	40.8581	40.8581	40.7032	40.7032	40.2031
Averages
			Mean
		Port	31 DAP	32 DAP	33 DAP	35 DAP	38 DAP	41 DAP	44 DAP	47 DAP	50 DAP	53 DAP	56 DAP	58 DAP	60 DAP	62 DAP	65 DAP	68 DAP	71 DAP	74 DAP	77 DAP	80 DAP	83 DAP	86 DAP
Treatment	58	1	18.4392	18.9935	19.1875	18.3652	18.944	19.0801	19.2853	21.8687	21.0188	20.6087	20.1098	19.936	19.936	19.1547	18.812	18.812	18.4339	18.2399	18.0068	18.2399	18.2234	18.5689																								58	1
	58	2	28.4855	28.3513	28.2395	28.6335	29.2865	29.6217	29.8527	30.8898	30.0656	30.2328	30.8153	31.0542	31.1559	31.638	31.8913	32.206	32.426	32.426	32.5421	32.8074	33.0855	33.0424																								58	2
	58	3	38.7104	38.3506	38.5432	39.1273	39.153	39.1397	39.0731	38.6651	38.5271	38.3182	38.3298	38.5301	38.5701	38.6843	38.6392	38.577	38.5324	38.5668	38.4559	38.3902	38.3707	38.3556																								58	3
	58	4	44.4263	44.4217	44.4778	44.4926	44.4972	44.5194	44.1507	44.2275	44.3248	44.2759	44.2558	44.2721	44.1981	44.177	44.1093	44.055	43.9877	43.9413	43.8762	43.8486	43.8465	43.7738																								58	4
	48	1	17.9837	17.5879	17.2068	16.7962	16.8197	16.6184	16.8197	19.3551	18.9803	18.585	18.2242	17.6048	17.2233	17.1998	16.6184	16.1849	16.1997	15.3562	15.1396	15.3562	15.3409	15.5574																								48	1
	48	2	28.7199	23.4179	21.147	19.4468	19.105	18.9593	18.7427	21.492	19.8692	19.8692	19.6954	19.7366	19.5278	20.2782	20.2782	20.6327	21.0015	21.3305	21.3305	22.4398	23.068	23.3812																								48	2
	48	3	37.9139	31.889	30.0868	29.3834	29.6451	30.6935	30.4364	31.1309	30.9309	31.1248	31.354	31.9744	31.6664	32.5936	32.7156	33.0937	32.9063	33.1222	33.3389	33.3595	33.6178	33.6235																					depth below soil surface			48	3
	48	4	44.1573	41.3528	40.7802	40.6683	40.4182	40.6538	40.3479	40.0281	39.8039	39.7489	39.6215	39.7527	39.7064	39.6239	39.4272	39.2294	39.1692	38.9619	38.9535	38.7709	38.9404	38.9163																								48	4
	38	1	17.2074	17.8273	16.9776	16.4163	15.549	15.0826	15.5809	18.2452	17.0363	16.0062	15.9984	15.3562	14.9308	14.9143	14.4646	13.8068	13.5737	13.349	12.8825	12.6494	12.8825	12.6407																								38	1
	38	2	29.9708	22.1271	19.1556	17.2563	17.2716	16.8701	16.8701	19.0918	17.4651	17.481	16.6769	16.6688	17.055	16.8782	16.6688	16.8701	17.0948	16.8782	17.0948	17.7223	18.1259	18.2874																					7			38	2
	38	3	39.0426	27.8149	22.8419	20.4177	20.4045	20.3922	20.0204	20.753	19.6526	19.6338	19.6398	19.8013	19.8338	20.2119	20.4207	20.7692	21.0805	22.1108	23.2147	24.1612	24.6315	24.5996																					17			38	3
	38	4	44.6063	33.5492	32.9639	32.3908	32.3141	32.3135	32.2206	32.4084	32.4282	32.5086	32.2152	32.5793	32.8487	32.9871	33.0749	33.406	33.3796	33.6012	33.5395	33.3062	34.1273	34.2216																					27			38	4
	28	1	17.1898	17.6629	16.5785	16.1757	15.0982	14.2312	14.6413	17.1926	15.7578	14.9065	15.1231	14.6977	13.9981	13.7816	13.7473	13.2976	13.3319	13.5485	12.8392	12.6146	12.3899	12.1481																					37			28	1
	28	2	27.7937	19.5221	17.0363	16.4096	15.1243	14.923	15.1243	16.6262	15.5655	15.3409	15.3409	15.3409	15.3409	15.1396	14.8996	14.6983	14.8996	14.8996	14.4652	14.8996	14.923	15.1078																								28	2
	28	3	38.4254	26.733	20.2119	18.1596	17.5171	17.3433	16.7228	17.1563	16.7228	16.3275	16.9316	16.7228	16.5425	16.5425	16.5425	16.3485	16.5425	16.5425	16.5425	16.5425	16.5425	16.7979																								28	3
	28	4	44.1591	28.3651	24.2837	19.7846	18.2527	17.6629	17.2528	17.2528	16.0143	16.4322	15.5968	15.5968	15.3802	15.3802	15.5968	15.5968	16.0221	16.0221	16.6485	17.0664	18.0729	18.454																								28	4
		Port	St. Error
Treatment	58	1	0.673447	0.870876	0.841112	1.228	1.19191	1.47931	1.36699	1.61194	1.6025	1.82719	1.7508	1.71828	1.71828	1.8826	1.76638	1.76638	1.76249	1.7562	1.91135	1.7562	1.83543	1.94186
	58	2	1.55556	1.57121	1.54499	1.42593	1.48879	1.47081	1.43514	1.56989	1.60989	1.68627	1.84606	1.88068	1.97258	2.00336	2.00658	1.94286	1.87513	1.87513	1.82338	1.77105	1.61532	1.57435
	58	3	0.720069	0.807757	0.688359	0.735889	0.748286	0.603051	0.45659	0.619759	0.630588	0.659789	0.740675	0.711512	0.725369	0.607559	0.613466	0.664138	0.658136	0.681089	0.730876	0.746765	0.692586	0.724243
	58	4	0.107563	0.103436	0.0812045	0.100117	0.126158	0.130526	0.317195	0.199144	0.224941	0.24662	0.238331	0.231747	0.235705	0.219186	0.218503	0.229044	0.206178	0.193461	0.170354	0.177784	0.169839	0.15212
	48	1	1.16801	1.15373	1.00972	1.01573	0.825916	0.771878	0.825916	0.972461	0.954784	1.02666	0.834568	1.019	0.865766	1.05064	0.771878	0.89813	0.783578	0.654073	0.633843	0.654073	0.798068	0.800732
	48	2	1.8383	1.82826	1.77544	1.46849	1.32343	1.08809	1.24422	1.05852	1.22382	1.22382	1.16791	0.909832	1.07208	0.957185	0.957185	0.986155	0.871857	0.996209	0.996209	1.33581	1.38673	1.39685
	48	3	0.603541	0.775166	1.53608	1.7196	1.58826	1.27251	1.76123	1.75728	1.74575	1.46381	1.35874	1.43663	1.27311	1.44362	1.34369	1.22533	1.25996	1.13665	0.998627	0.92448	0.89614	0.880514
	48	4	0.310146	0.565528	0.620688	0.532625	0.458193	0.34031	0.384435	0.665207	0.773044	0.727615	0.808514	0.705215	0.722227	0.744636	0.762443	0.690335	0.732685	0.734711	0.667863	0.691686	0.717968	0.774327
	38	1	0.999116	0.868343	1.14337	0.724737	0.882866	1.13066	0.553278	0.657188	0.72543	0.593502	0.682104	0.654073	0.493379	0.707602	0.763544	0.511823	0.560655	0.458841	0.443081	0.375468	0.443081	0.530956
	38	2	0.703279	1.20812	1.78317	1.68897	1.62137	1.63535	1.63535	2.00954	1.66379	1.58665	1.56983	1.61031	1.67637	1.59525	1.61031	1.63535	1.54356	1.59525	1.54356	1.43726	1.39678	1.52898
	38	3	0.465877	0.989237	0.963763	1.20676	1.27235	1.32231	1.40218	1.30955	1.40015	1.46961	1.44948	1.53803	1.40973	1.31774	1.15907	1.19861	1.3721	1.31703	1.41941	1.33591	1.23868	1.35716
	38	4	0.0373806	0.515442	0.8199	0.622658	0.539698	0.550725	0.544997	0.516461	0.384196	0.459296	0.559075	0.573249	0.577744	0.74752	0.762478	0.785937	0.889493	0.974039	0.885727	0.821669	0.811609	0.764175
	28	1	1.14838	0.514122	1.10182	0.991713	1.02879	0.852737	1.12431	1.09468	0.934477	0.780679	0.812869	0.653294	0.910494	0.809862	1.10073	1.01564	0.695334	0.839828	0.94453	0.840136	0.70305	0.721327
	28	2	1.97205	1.09395	0.72543	0.76931	0.780512	0.593504	0.780512	0.693077	0.718985	0.798068	0.798068	0.798068	0.798068	0.633843	0.824377	0.632483	0.824377	0.824377	0.745862	0.824377	0.593504	0.931703
	28	3	1.26544	2.07054	1.31774	1.24754	1.49167	1.37367	1.41503	1.29418	1.41503	1.30329	1.40484	1.41503	1.28821	1.28821	1.28821	1.20576	1.28821	1.28821	1.28821	1.28821	1.28821	0.980953
	28	4	0.410462	0.654856	0.712752	0.460466	0.567762	0.514122	0.588986	0.588986	0.475601	0.531839	0.265268	0.265268	0.265268	0.265268	0.265268	0.265268	0.336323	0.336323	0.425376	0.324204	0.312521	0.4942
Mean		Port	31 DAP	35 DAP	60 DAP	86 DAP	Port
		40	18.4392	18.3652	19.936	18.5689	40
		30	28.4855	28.6335	31.1559	33.0424	30
		20	38.7104	39.1273	38.5701	38.3556	20
		10	44.4263	44.4926	44.1981	43.7738	10
		40	17.9837	16.7962	17.2233	15.5574	40
		30	28.7199	19.4468	19.5278	23.3812	30
		20	37.9139	29.3834	31.6664	33.6235	20
		10	44.1573	40.6683	39.7064	38.9163	10
		40	17.2074	16.4163	14.9308	12.6407	40
		30	29.9708	17.2563	17.055	18.2874	30
		20	39.0426	20.4177	19.8338	24.5996	20
		10	44.6063	32.3908	32.8487	34.2216	10
		40	17.1898	16.1757	13.9981	12.1481	40
		30	27.7937	16.4096	15.3409	15.1078	30
		20	38.4254	18.1596	16.5425	16.7979	20
		10	44.1591	19.7846	15.3802	18.454	10
St. Error		40	0.673447	1.228	1.71828	1.94186	40
		30	1.55556	1.42593	1.97258	1.57435	30
		20	0.720069	0.735889	0.725369	0.724243	20
		10	0.107563	0.100117	0.235705	0.15212	10
		40	1.16801	1.01573	0.865766	0.800732	40
		30	1.8383	1.46849	1.07208	1.39685	30
		20	0.603541	1.7196	1.27311	0.880514	20
		10	0.310146	0.532625	0.722227	0.774327	10
		40	0.999116	0.724737	0.493379	0.530956	40
		30	0.703279	1.68897	1.67637	1.52898	30
		20	0.465877	1.20676	1.40973	1.35716	20
		10	0.0373806	0.622658	0.577744	0.764175	10
		40	1.14838	0.991713	0.910494	0.721327	40
		30	1.97205	0.76931	0.798068	0.931703	30
		20	1.26544	1.24754	1.28821	0.980953	20
		10	0.410462	0.460466	0.265268	0.4942	10
[truncated: 4 more columns]

## Sheet: Water Use
Block	Pot	Treatment	16-26 DAP (10 Days)	27-31 DAP (96 hours)	33-35 DAP (2 Days)	35-38 DAP (3 Days)	38-41 DAP(3 Days)	41-44 DAP(3 Days)	44-47 DAP(3 Days)	47-50 DAP (3 days)	50-53 DAP (3 days)	53-56 DAP (3 Days)	56-58 DAP (2 Days)	58-60 DAP (2 Days)	60-62 DAP (2 Days)	62-65 DAP (3 Days)	65-68 DAP (3 Days)	68-71 DAP (3 Days)	71-74 DAP (3 Days)	74-77 DAP (3 Days)	77-80 DAP (3 Days)	80-83 DAP (3 Days)	83-86 DAP (3 Days)	86-91 DAP (5 Days, post-harvest)
1	1	58	14.8	14	6.3	12.9	14.7	15.5	14.6	19.9	21.1	22.6	15.2	14	12.2	21.1	18.3	16.4	15.1	12.9	12	8.7	7.7	0.5
1	2	38	9.9	9.7	2.4	4.4	4.7	5	4	6.7	7.9	9.2	6.8	6.6	4.9	9.7	8	7.1	6.5	4.9	3.5	1.2	1.1	0.6
2	3	38	6	8.4	1.4	3.8	4.7	5.6	5.2	7	8.8	10.1	7.1	6.5	6.6	9.9	8.2	6.7	5.8	3.1	1.1	0.4	0.7	0.8
2	4	28	9.5	9.6	0	1.3	2.3	2.9	2.6	3.6	3.9	4.4	3.1	3	2.1	4.3	3.7	3.2	2.7	1.4	0.8	0	0.4	0.6
3	5	28	6.4	9.1	0.2	1.7	2.5	2.3	2.7	4	4.2	4.8	3.3	3.2	2.5	4.1	2.4	1.1	0.2	1.4	0	0	0.2	0.5
3	6	48	11	13.5	5.5	9.1	9.9	10.1	8.7	12.1	14.2	15.9	10.8	9.8	9.2	14.7	12.3	10.6	10.4	8.5	5.6	2.2	1.4	0.6
4	7	38	10.6	12	3.4	4.9	5.8	6.2	6.4	8.9	10	10.5	7.7	7.3	6.6	11.7	9.6	8.5	7.8	4.7	2.9	0.2	0.8	0.5
4	8	58	11.6	11.6	6.1	10.6	10.7	10.3	8	12.3	14.2	16	10.7	9.7	8.6	14	11.7	10.2	10.3	8.2	6.3	3.4	2	0.6
5	9	28	16.1	13	0.9	3.1	3.5	3.5	3.6	5.2	5.3	6.2	4.2	4.3	4.2	6.5	5.5	5	4.7	3.1	1.4	0.5	0.5	0.5
5	10	58	11.3	11.5	5.1	11	11.5	11.4	9.9	14.9	17.2	18.9	12.3	11.6	10.3	17.1	14.4	12.8	12.2	10.7	9.5	7.5	6.2	0.9
1	11	48	14.5	10.6	4.3	7.7	8.2	7.8	6.7	10	11	12.2	7.9	7.3	6.3	11	9.4	9.3	8.5	6.5	5.6	3	2.5	0.9
1	12	28	20	9.6	1.3	1.1	3.2	3.1	3.5	5.5	6.7	7.4	5.4	5.2	5.1	8.1	7.7	6.9	6.5	5.3	4.1	0.5	0.7	0.5
2	13	48	11.1	12.8	5.8	9.7	10.4	10.4	9.3	13.2	14.6	15.7	10.5	9.2	8.3	13.2	11.5	10.6	9.9	7.9	6.2	2.3	3.7	0
2	14	58	15.8	13.3	6.8	13.1	13.2	13.9	11.2	17.8	19.7	20.2	12.2	10.4	9.5	16.3	13.7	12.2	11.4	9.7	7.7	3.8	2.7	0.3
3	15	38	7.8	12.9	3.6	6.5	7	7.7	8.2	11.5	12.5	14	10	9.6	9.1	15.2	13.2	12.3	11.2	9.5	8.5	5.7	6.7	0.4
3	16	58	8.1	9	5.3	9.1	9.3	9.3	8.2	12.1	13.9	14.5	10.1	9.8	8.8	14.4	12.3	12.1	11.6	10.4	9.8	6.2	4.1	1.4
4	17	48	11.5	9.6	3.4	7	8.4	7.9	6.8	10.7	12.7	12.4	8.1	7.9	6.6	11.9	10.1	9.1	8.8	7.7	4.6	2.7	1.3	0.9
4	18	28	10.9	10.3	0.9	2.1	2.9	3	3.3	5	5.9	7	5.3	5.2	5	8.1	7.7	6.7	6.8	5.4	2.9	0.6	0.4	0.4
5	19	38	9	11	1.4	6.5	7.2	7.6	7.4	10.2	11.5	12.5	8.3	7.9	6.8	10.9	9.1	8.9	8.1	3.8	1	0	0.5	0.7
5	20	48	9	10.7	5.7	8.8	9.4	9.4	9.3	11.8	12.8	14.3	9.8	9.3	8.7	13.9	12.4	11.8	11.7	10.2	10	6	5.2	0.9
Volumes
Daily
Block	Pot	Treatment	16-26 DAP (10 Days)	27-31 DAP (96 hours)	33-35 DAP (2 Days)	35-38 DAP (3 Days)	38-41 DAP(3 Days)	41-44 DAP(3 Days)	44-47 DAP(3 Days)	47-50 DAP (3 days)	50-53 DAP (3 days)	53-56 DAP (3 Days)	56-58 DAP (2 Days)	58-60 DAP (2 Days)	60-62 DAP (2 Days)	62-65 DAP (3 Days)	65-68 DAP (3 Days)	68-71 DAP (3 Days)	71-74 DAP (3 Days)	74-77 DAP (3 Days)	77-80 DAP (3 Days)	80-83 DAP (3 Days)	83-86 DAP (3 Days)	86-91 DAP (5 Days, post-harvest)	Total (35 DAP-86 DAP)
1	1	58	302.337	285.995	128.698	263.524	300.294	316.637	298.252	406.521	431.035	461.677	310.508	285.995	249.224	431.035	373.836	335.022	308.466	263.524	245.138	177.725	157.297	10.2141	5615.71
1	2	38	202.239	198.153	49.0277	89.884	96.0125	102.141	81.7128	136.869	161.383	187.939	138.912	134.826	100.098	198.153	163.426	145.04	132.783	100.098	71.4987	24.5138	22.471	12.2569	2087.76
2	3	38	122.569	171.597	28.5995	77.6271	96.0125	114.398	106.227	142.997	179.768	206.325	145.04	132.783	134.826	202.239	167.511	136.869	118.483	63.3274	22.471	8.17128	14.2997	16.3426	2069.38
2	4	28	194.068	196.111	0	26.5566	46.9848	59.2417	53.1133	73.5415	79.6699	89.884	63.3274	61.2846	42.8992	87.8412	75.5843	65.3702	55.1561	28.5995	16.3426	0	8.17128	12.2569	933.568
3	5	28	130.74	185.897	4.08564	34.7279	51.0705	46.9848	55.1561	81.7128	85.7984	98.0553	67.413	65.3702	51.0705	83.7556	49.0277	22.471	4.08564	28.5995	0	0	4.08564	10.2141	829.384
3	6	48	224.71	275.781	112.355	185.897	202.239	206.325	177.725	247.181	290.08	324.808	220.624	200.196	187.939	300.294	251.267	216.539	212.453	173.64	114.398	44.942	28.5995	12.2569	3585.15
4	7	38	216.539	245.138	69.4558	100.098	118.483	126.655	130.74	181.811	204.282	214.496	157.297	149.126	134.826	239.01	196.111	173.64	159.34	96.0125	59.2417	4.08564	16.3426	10.2141	2461.6
4	8	58	236.967	236.967	124.612	216.539	218.582	210.41	163.426	251.267	290.08	326.851	218.582	198.153	175.682	285.995	239.01	208.368	210.41	167.511	128.698	69.4558	40.8564	12.2569	3619.88
5	9	28	328.894	265.566	18.3854	63.3274	71.4987	71.4987	73.5415	106.227	108.269	126.655	85.7984	87.8412	85.7984	132.783	112.355	102.141	96.0125	63.3274	28.5995	10.2141	10.2141	10.2141	1436.1
5	10	58	230.839	234.924	104.184	224.71	234.924	232.881	202.239	304.38	351.365	386.093	251.267	236.967	210.41	349.322	294.166	261.481	249.224	218.582	194.068	153.211	126.655	18.3854	4481.94
1	11	48	296.209	216.539	87.8412	157.297	167.511	159.34	136.869	204.282	224.71	249.224	161.383	149.126	128.698	224.71	192.025	189.982	173.64	132.783	114.398	61.2846	51.0705	18.3854	2878.33
1	12	28	408.564	196.111	26.5566	22.471	65.3702	63.3274	71.4987	112.355	136.869	151.169	110.312	106.227	104.184	165.468	157.297	140.955	132.783	108.269	83.7556	10.2141	14.2997	10.2141	1756.82
2	13	48	226.753	261.481	118.483	198.153	212.453	212.453	189.982	269.652	298.252	320.723	214.496	187.939	169.554	269.652	234.924	216.539	202.239	161.383	126.655	46.9848	75.5843	0	3607.62
2	14	58	322.765	271.695	138.912	267.609	269.652	283.952	228.796	363.622	402.435	412.649	249.224	212.453	194.068	332.979	279.866	249.224	232.881	198.153	157.297	77.6271	55.1561	6.12846	4467.64
3	15	38	159.34	263.524	73.5415	132.783	142.997	157.297	167.511	234.924	255.352	285.995	204.282	196.111	185.897	310.508	269.652	251.267	228.796	194.068	173.64	116.441	136.869	8.17128	3644.39
3	16	58	165.468	183.854	108.269	185.897	189.982	189.982	167.511	247.181	283.952	296.209	206.325	200.196	179.768	294.166	251.267	247.181	236.967	212.453	200.196	126.655	83.7556	28.5995	3799.64
4	17	48	234.924	196.111	69.4558	142.997	171.597	161.383	138.912	218.582	259.438	253.31	165.468	161.383	134.826	243.095	206.325	185.897	179.768	157.297	93.9697	55.1561	26.5566	18.3854	2955.96
4	18	28	222.667	210.41	18.3854	42.8992	59.2417	61.2846	67.413	102.141	120.526	142.997	108.269	106.227	102.141	165.468	157.297	136.869	138.912	110.312	59.2417	12.2569	8.17128	8.17128	1701.67
5	19	38	183.854	224.71	28.5995	132.783	147.083	155.254	151.169	208.368	234.924	255.352	169.554	161.383	138.912	222.667	185.897	181.811	165.468	77.6271	20.4282	0	10.2141	14.2997	2618.89
5	20	48	183.854	218.582	116.441	179.768	192.025	192.025	189.982	241.053	261.481	292.123	200.196	189.982	177.725	283.952	253.31	241.053	239.01	208.368	204.282	122.569	106.227	18.3854	3775.13
Cumulative
Block	Pot	Treatment	26	31	35	38	41	44	47	50	53	56	58	60	62	65	68	71	74	77	80	83	86		Total (35 DAP-86 DAP)
1	1	58	302.337	588.332	717.029	980.553	1280.85	1597.48	1895.74	2302.26	2733.29	3194.97	3505.48	3791.47	4040.7	4471.73	4845.57	5180.59	5489.05	5752.58	5997.72	6175.44	6332.74			5615.71
1	2	38	202.239	400.393	449.42	539.304	635.317	737.458	819.17	956.039	1117.42	1305.36	1444.27	1579.1	1679.2	1877.35	2040.78	2185.82	2318.6	2418.7	2490.2	2514.71	2537.18			2087.76																				57.9139	control
2	3	38	122.569	294.166	322.765	400.393	496.405	610.803	717.029	860.027	1039.79	1246.12	1391.16	1523.94	1658.77	1861.01	2028.52	2165.39	2283.87	2347.2	2369.67	2377.84	2392.14			2069.38																				43.2056	10 cm
2	4	28	194.068	390.178	390.178	416.735	463.72	522.962	576.075	649.616	729.286	819.17	882.498	943.782	986.682	1074.52	1150.11	1215.48	1270.63	1299.23	1315.58	1315.58	1323.75			933.568																				26.6588	20 cm
3	5	28	130.74	316.637	320.723	355.45	406.521	453.506	508.662	590.375	676.173	774.228	841.641	907.012	958.082	1041.84	1090.87	1113.34	1117.42	1146.02	1146.02	1146.02	1150.11			829.384																				9.49911	30 cm
3	6	48	224.71	500.491	612.846	798.742	1000.98	1207.31	1385.03	1632.21	1922.29	2247.1	2467.73	2667.92	2855.86	3156.16	3407.42	3623.96	3836.41	4010.05	4124.45	4169.39	4197.99			3585.15
4	7	38	216.539	461.677	531.133	631.231	749.715	876.369	1007.11	1188.92	1393.2	1607.7	1765	1914.12	2048.95	2287.96	2484.07	2657.71	2817.05	2913.06	2972.3	2976.39	2992.73			2461.6
4	8	58	236.967	473.934	598.546	815.085	1033.67	1244.08	1407.5	1658.77	1948.85	2275.7	2494.28	2692.44	2868.12	3154.11	3393.12	3601.49	3811.9	3979.41	4108.11	4177.56	4218.42			3619.88
5	9	28	328.894	594.46	612.846	676.173	747.672	819.17	892.712	998.938	1107.21	1233.86	1319.66	1407.5	1493.3	1626.08	1738.44	1840.58	1936.59	1999.92	2028.52	2038.73	2048.95			1436.1
5	10	58	230.839	465.763	569.946	794.657	1029.58	1262.46	1464.7	1769.08	2120.45	2506.54	2757.81	2994.77	3205.18	3554.5	3848.67	4110.15	4359.38	4577.96	4772.02	4925.24	5051.89			4481.94
1	11	48	296.209	512.748	600.589	757.886	925.397	1084.74	1221.61	1425.89	1650.6	1899.82	2061.2	2210.33	2339.03	2563.74	2755.76	2945.74	3119.38	3252.17	3366.57	3427.85	3478.92			2878.33
1	12	28	408.564	604.674	631.231	653.702	719.072	782.4	853.898	966.253	1103.12	1254.29	1364.6	1470.83	1575.01	1740.48	1897.78	2038.73	2171.52	2279.79	2363.54	2373.76	2388.06			1756.82
2	13	48	226.753	488.234	606.717	804.871	1017.32	1229.78	1419.76	1689.41	1987.66	2308.39	2522.88	2710.82	2880.37	3150.03	3384.95	3601.49	3803.73	3965.11	4091.77	4138.75	4214.34			3607.62
2	14	58	322.765	594.46	733.372	1000.98	1270.63	1554.59	1783.38	2147	2549.44	2962.09	3211.31	3423.76	3617.83	3950.81	4230.68	4479.9	4712.78	4910.94	5068.23	5145.86	5201.02			4467.64
3	15	38	159.34	422.864	496.405	629.188	772.186	929.483	1096.99	1331.92	1587.27	1873.26	2077.55	2273.66	2459.55	2770.06	3039.71	3290.98	3519.78	3713.84	3887.48	4003.93	4140.79			3644.39
3	16	58	165.468	349.322	457.591	643.488	833.47	1023.45	1190.96	1438.14	1722.1	2018.31	2224.63	2424.83	2604.59	2898.76	3150.03	3397.21	3634.17	3846.63	4046.82	4173.48	4257.23			3799.64
4	17	48	234.924	431.035	500.491	643.488	815.085	976.467	1115.38	1333.96	1593.4	1846.71	2012.18	2173.56	2308.39	2551.48	2757.81	2943.7	3123.47	3280.77	3374.74	3429.89	3456.45			2955.96
4	18	28	222.667	433.078	451.463	494.362	553.604	614.888	682.302	784.442	904.969	1047.97	1156.24	1262.46	1364.6	1530.07	1687.37	1824.24	1963.15	2073.46	2132.7	2144.96	2153.13			1701.67
5	19	38	183.854	408.564	437.163	569.946	717.029	872.284	1023.45	1231.82	1466.74	1722.1	1891.65	2053.03	2191.94	2414.61	2600.51	2782.32	2947.79	3025.41	3045.84	3045.84	3056.06			2618.89
5	20	48	183.854	402.435	518.876	698.644	890.669	1082.69	1272.68	1513.73	1775.21	2067.33	2267.53	2457.51	2635.24	2919.19	3172.5	3413.55	3652.56	3860.93	4065.21	4187.78	4294.01			3775.13
Averages
			Mean
Overall			226.957
Daily
			16-26 DAP (10 Days)	27-31 DAP (96 hours)	33-35 DAP (2 Days)	35-38 DAP (3 Days)	38-41 DAP(3 Days)	41-44 DAP(3 Days)	44-47 DAP(3 Days)	47-50 DAP (3 days)	50-53 DAP (3 days)	53-56 DAP (3 Days)	56-58 DAP (2 Days)	58-60 DAP (2 Days)	60-62 DAP (2 Days)	62-65 DAP (3 Days)	65-68 DAP (3 Days)	68-71 DAP (3 Days)	71-74 DAP (3 Days)	74-77 DAP (3 Days)	77-80 DAP (3 Days)	80-83 DAP (3 Days)	83-86 DAP (3 Days)	86-91 DAP (5 Days, post-harvest)	Total (35 DAP-86 DAP)
Treatments		58	251.675	242.687	120.935	231.656	242.687	246.773	212.045	314.594	351.773	376.696	247.181	226.753	201.831	338.699	287.629	260.255	247.59	212.045	185.079	120.935	92.744	15.1169	4396.96
		48	233.29	233.698	100.915	172.822	189.165	186.305	166.694	236.15	266.792	288.037	192.434	177.725	159.748	264.341	227.57	210.002	201.422	166.694	130.74	66.1873	57.6075	13.4826	3360.44
		38	176.908	220.624	49.8448	106.635	120.118	131.149	127.472	180.994	207.142	230.021	163.017	154.846	138.912	234.516	196.519	177.725	160.974	106.227	69.4558	30.6423	40.0393	12.2569	2576.4
		28	256.987	210.819	13.4826	37.9964	58.8332	60.4674	64.1445	95.1954	106.227	121.752	87.0241	85.3898	77.2186	127.063	110.312	93.5611	85.3898	67.8216	37.5879	6.53702	8.9884	10.2141	1331.51
Block		1	302.337	224.199	73.0308	133.294	157.297	160.361	147.083	215.007	238.499	262.502	180.279	169.043	145.551	254.842	221.646	202.75	186.918	151.169	128.698	68.4344	61.2846	12.7676	3084.66
		2	216.539	225.221	71.4987	142.487	156.276	167.511	144.529	212.453	240.031	257.395	168.022	148.615	135.337	223.178	189.471	167	152.19	112.866	80.6913	33.1958	38.3029	8.68198	2769.55
		3	170.065	227.264	74.5629	134.826	146.572	150.147	141.976	202.75	228.796	251.267	174.661	165.468	151.169	247.181	205.303	184.364	170.575	152.19	122.058	72.0094	63.3274	14.8104	2964.64
		4	227.774	222.157	70.4773	125.633	141.976	139.933	125.123	188.45	218.582	234.413	162.404	153.722	136.869	233.392	199.686	176.193	172.107	132.783	85.2877	35.2386	22.9817	12.2569	2684.77
		5	231.86	235.946	66.9023	150.147	161.383	162.915	154.233	215.007	239.01	265.056	176.704	169.043	153.211	247.181	211.432	196.621	187.429	141.976	111.844	71.4987	63.3274	15.3211	3078.02
			St. Error	St. Error
			7.80264	10.3539
		58	28.0201	17.7078	6.47287	15.2952	19.3195	23.456	24.653	31.2358	29.3726	29.6357	18.0532	16.3426	13.3238	25.9156	23.6861	20.7082	16.4621	15.6032	19.8332	21.0063	21.7979	3.90814	350.586
		48	18.0579	14.9643	9.59473	9.9785	8.65731	11.1029	11.9745	11.3849	13.01	16.0462	12.3147	9.60342	11.8307	13.6518	12.2331	10.0784	11.7812	12.3519	19.1197	14.3957	15.0588	3.57347	184.335
		38	16.616	16.3808	9.61645	11.2522	10.9895	10.9705	15.3633	18.7739	17.2446	17.8159	11.5812	11.5451	13.6884	20.3709	19.2329	20.2229	19.0037	22.9306	27.9052	21.8496	24.2881	1.44449	287.352
		28	49.609	14.2325	4.94514	7.23977	4.4942	3.96117	4.21633	7.46678	10.654	12.0786	9.85223	9.63379	12.8129	17.8837	21.6577	22.4096	25.2468	18.081	15.0754	2.69466	1.65959	0.645996	192.268
		1	42.1716	21.1043	22.4613	51.3988	52.2485	55.6988	52.3948	66.7306	66.7931	69.4033	44.6499	39.9907	35.1299	59.9674	51.2913	45.468	41.6446	38.09	39.8481	37.9849	32.9606	1.9335	875.868
		2	41.5568	24.4908	33.7941	55.0765	51.3049	50.1011	39.7815	64.7072	70.1855	69.9895	41.0718	33.5397	33.1224	52.4171	44.4313	41.2829	40.3812	39.982	35.953	18.0103	16.2224	3.57493	787.769
		3	19.7245	24.6041	25.054	35.6373	34.2984	35.8659	29.0399	40.449	48.2627	51.7268	35.9337	33.3799	33.4112	54.5793	52.2718	54.518	55.73	41.9525	44.4626	30.1085	29.6385	4.67139	713.187
		4	4.89851	11.4159	21.6914	36.5859	34.3301	31.3436	20.4516	32.077	37.1939	38.3573	22.5868	18.9512	15.0579	25.0106	16.8326	14.9507	15.25	17.4738	16.6247	15.9849	7.04575	2.2065	404.584
		5	34.188	10.4331	25.2734	34.4918	34.9177	34.3491	29.0159	41.3755	50.1982	53.7212	34.6728	31.231	26.8043	46.073	39.8611	35.7384	35.7287	41.4353	50.4909	38.8941	30.9472	1.95585	668.559
Cumulative
Average			27	31	35	38	41	44	47	50	53	56	58	60	62	65	68	71	74	77	80	83	86
		58	251.675	494.362	615.297	726.018	968.705	1215.48	1427.52	1742.12	2093.89	2470.59	2717.77	2944.52	3146.35	3485.05	3772.68	4032.93	4280.52	4492.57	4677.65	4798.58	4891.33
		48	233.29	466.988	567.904	639.811	828.976	1015.28	1181.98	1418.12	1684.92	1972.95	2165.39	2343.11	2502.86	2767.2	2994.77	3204.77	3406.2	3572.89	3703.63	3769.82	3827.43
		38	176.908	397.533	447.377	504.168	624.285	755.434	882.906	1063.9	1271.04	1501.06	1664.08	1818.93	1957.84	2192.35	2388.87	2566.6	2727.57	2833.8	2903.25	2933.9	2973.94
		28	256.987	467.806	481.288	505.802	564.635	625.103	689.247	784.442	890.669	1012.42	1099.45	1184.83	1262.05	1389.12	1499.43	1592.99	1678.38	1746.2	1783.79	1790.33	1799.31
St. Error			27	31	35	38	41	44	47	50	53	56	58	60	62	65	68	71	74	77	80	83	86
		58	28.0201	45.3441	50.7442	65.8492	84.1671	106.7	128.545	158.845	187.511	216.45	232.989	245.971	257.235	280.662	302.098	319.376	333.006	344.775	357.298	369.843	386.077
		48	18.0579	21.3628	24.0238	30.8229	37.0387	46.2806	55.2657	65.1131	75.7591	91.3631	103.211	111.637	122.146	133.782	144.303	151.826	160.482	168.106	177.39	180.56	188.796
		38	16.616	27.9022	35.3945	42.2394	50.1303	58.0477	70.77	88.4411	104.373	120.34	131.016	141.908	153.213	171.593	189.216	208.939	227.574	246.389	268.022	285.639	307.04
		28	59.2439	56.5031	60.6941	63.4492	67.7311	71.3859	76.5635	84.3702	94.8594	103.954	112.445	121.085	137.955	154.602	173.481	195.074	216.859	229.702	239.912	242.188	262.813
Daily
			16-26 DAP (10 Days)	27-31 DAP (96 hours)	33-35 DAP (2 Days)	35-38 DAP (3 Days)	38-41 DAP(3 Days)	41-44 DAP(3 Days)	44-47 DAP(3 Days)	47-50 DAP (3 days)	50-53 DAP (3 days)	53-56 DAP (3 Days)	56-58 DAP (2 Days)	58-60 DAP (2 Days)	60-62 DAP (2 Days)	62-65 DAP (3 Days)	65-68 DAP (3 Days)	68-71 DAP (3 Days)	71-74 DAP (3 Days)	74-77 DAP (3 Days)	77-80 DAP (3 Days)	80-83 DAP (3 Days)	83-86 DAP (3 Days)
		58	25.1675	60.6717	60.4674	77.2186	80.8956	82.2575	70.6815	104.865	117.258	125.565	123.591	113.376	100.915	112.9	95.8763	86.7517	82.5299	70.6815	61.6931	40.3116	30.9147
		48	23.329	58.4246	50.4576	57.6075	63.055	62.1017	55.5647	78.7166	88.9307	96.0125	96.2168	88.8626	79.8742	88.1136	75.8567	70.0006	67.1406	55.5647	43.5801	22.0624	19.2025
		38	17.6908	55.1561	24.9224	35.545	40.0393	43.7163	42.4906	60.3313	69.0473	76.6738	81.5085	77.4228	69.4558	78.1719	65.5064	59.2417	53.658	35.4089	23.1519	10.2141	13.3464
		28	25.6987	52.7047	6.7413	12.6655	19.6111	20.1558	21.3815	31.7318	35.4089	40.584	43.512	42.6949	38.6093	42.3544	36.7707	31.187	28.4633	22.6072	12.5293	2.17901	2.99613

## Sheet: Harvest
Block	Pot	Treatment	Pod Number	Shoot Dry Mass (g)	Seed Number	Seed Dry Mass (g)	Root Dry Mass (g)	Plant Height (cm)	Dry Stem Width (mm)	Seeds Per Pod	Pod Number/SDM	Seed Number/SDM	Mean Seed Weight	Harvest Index	100 Seed Weight	Root/Shoot Ratio
1	1	58	31	17.21	60	7.7	2.83	92.3	4.3	1.93548	1.80128	3.48635	0.128333	0.447414	12.8333	0.164439
1	2	38	11	7.6	27	4.2	2.12	53.1	3.72	2.45455	1.44737	3.55263	0.155556	0.552632	15.5556	0.278947
2	3	38	11	7.3	24	4.39	1.55	48.6	3.26	2.18182	1.50685	3.28767	0.182917	0.60137	18.2917	0.212329
2	4	28	12	5.93	23	3.01	2.02	48.2	3.13	1.91667	2.02361	3.87858	0.13087	0.507589	13.087	0.340641
3	5	28	10	5.63	25	2.53	1.93	40.5	3.14	2.5	1.7762	4.4405	0.1012	0.449378	10.12	0.342806
3	6	48	21	11.32	38	5.93	1.54	65.2	3.82	1.80952	1.85512	3.35689	0.156053	0.523852	15.6053	0.136042
4	7	38	16	8.29	32	4.52	1.46	50.1	3.68	2	1.93004	3.86007	0.14125	0.545235	14.125	0.176116
4	8	58	25	12.46	45	6.24	1.6	75.6	3.81	1.8	2.00642	3.61156	0.138667	0.500803	13.8667	0.128411
5	9	28	15	7.42	27	3.53	2.17	51	3.56	1.8	2.02156	3.63881	0.130741	0.475741	13.0741	0.292453
5	10	58	27	13.45	50	6.59	1.52	76.4	4.04	1.85185	2.00743	3.71747	0.1318	0.489963	13.18	0.113011
1	11	48	20	10.58	35	4.91	1.69	86.5	4.19	1.75	1.89036	3.30813	0.140286	0.464083	14.0286	0.159735
1	12	28	15	6.38	20	2.98	2.07	42.7	3.35	1.33333	2.3511	3.1348	0.149	0.467085	14.9	0.324451
2	13	48	23	13.52	44	6.13	2.9	82.1	4.14	1.91304	1.70118	3.25444	0.139318	0.453402	13.9318	0.214497
2	14	58	30	15.11	59	6.99	2.43	86.9	4.67	1.96667	1.98544	3.9047	0.118475	0.462608	11.8475	0.160821
3	15	38	18	11.08	31	5.33	2.33	53.8	3.91	1.72222	1.62455	2.79783	0.171935	0.481047	17.1935	0.210289
3	16	58	20	11.97	39	6.49	1.63	53	3.84	1.95	1.67084	3.25815	0.16641	0.542189	16.641	0.136174
4	17	48	15	10.3	37	5.64	3.16	58.9	4	2.46667	1.45631	3.59223	0.152432	0.547573	15.2432	0.306796
4	18	28	9	6.11	21	3.61	2.01	48.3	3.17	2.33333	1.473	3.43699	0.171905	0.590835	17.1905	0.328969
5	19	38	12	8.7	31	4.41	1.23	58.6	3.46	2.58333	1.37931	3.56322	0.142258	0.506897	14.2258	0.141379
5	20	48	20	11.56	36	4.82	2.25	69.4	4.12	1.8	1.7301	3.11419	0.133889	0.416955	13.3889	0.194637
Means
Treatment	Pod Number	Shoot Dry Mass (g)	Seed Number	Seed Dry Mass (g)	Root Dry Mass (g)	Seeds Per Pod	Pod Number/SDM	Seed Number/SDM	Mean Seed Weight	Harvest Index	100 Seed Weight	Root/Shoot Ratio
58	26.6	14.04	50.6	6.802	2.002	1.9008	1.89428	3.59564	0.136737	0.488595	13.6737	0.140571
48	19.8	11.456	38	5.486	2.308	1.94785	1.72662	3.32518	0.144396	0.481173	14.4396	0.202342
38	13.6	8.594	29	4.57	1.738	2.18838	1.57762	3.41229	0.158783	0.537436	15.8783	0.203812
28	12.2	6.294	23.2	3.132	2.04	1.97667	1.92909	3.70594	0.136743	0.498125	13.6743	0.325864
St. Error
Treatment	Pod Number	Shoot Dry Mass (g)	Seed Number	Seed Dry Mass (g)	Root Dry Mass (g)	Seeds Per Pod	Pod Number/SDM	Seed Number/SDM	Mean Seed Weight	Harvest Index	100 Seed Weight	Root/Shoot Ratio
58	1.96469	0.957162	4.03237	0.254939	0.264677	0.0320301	0.0679201	0.108734	0.00810166	0.0164231	0.810166	0.00976343
48	1.31909	0.565381	1.58114	0.265605	0.320272	0.132386	0.0765016	0.0781461	0.0042044	0.0238931	0.42044	0.0294353
38	1.43527	0.668817	1.51658	0.19685	0.208216	0.154865	0.0968763	0.178335	0.00820463	0.0206054	0.820463	0.0228306
28	1.24097	0.3068	1.28062	0.198404	0.0394968	0.206128	0.146112	0.220502	0.0116628	0.0250254	1.16628	0.00903698

## Sheet: Liner Experiment Harvest
Pot	Treatment	Shoot Dry Weight (g)
1	nothing	0.85
2	nothing	0.7
3	nothing	1.15
4	nothing	1.2
5	screws	1.16
6	screws	1.52
7	screws	1.36
8	screws	0.37
9	halfliner	3.51
10	halfliner	2.91
11	halfliner	2.64
12	halfliner	2.92
13	liner	2.13
14	liner	3.18
15	liner	3.71
16	liner	2.13
17	linerscrews	2.98
18	linerscrews	3.1
19	linerscrews	4.08
20	linerscrews	3.74
